# Supplementary material for: A Gravitational-like Relationship of Dispersion Interactions is Exhibited by 40 Pairs of Molecules and Noble Gas Atoms
Source: PubMed Central journal article supplement (PMC11565636; doi:10.1021/jacs.4c11211), 2024-10-31
Supplement: ja4c11211_si_001.pdf [file ja4c11211_si_001.pdf]

## Supporting Information

### A Gravitational-Like Relationship of Dispersion Interactions is Exhibited by 40 Pairs of Molecules and Noble Gas Atoms

David Danovich,<sup>a(0000-0002-8730-5119)</sup> Alexandre Tkatchenko,<sup>b(0000-0002-1012-4854)</sup> Santiago Alvarez,<sup>c(0000-0002-4618-4189)</sup> and Sason Shaik<sup>\*a(0000-0001-7643-9421)</sup>

**AFFILIATIONS:** <sup>a)</sup> Institute of Chemistry, The Hebrew University of Jerusalem, Jerusalem 9190401, Israel. sason.shaik@gmail.com <sup>b)</sup> Department of Physics and Materials Science, University of Luxembourg, L-1511 Luxembourg City, Luxembourg <sup>c)</sup> Inorganic and Organic Chemistry Department, Universitat de Barcelona, Martí i Franquès 1-11, 08028 Barcelona, Spain.

\* Author to whom correspondence should be addressed.

| Table of Contents                                                                                                                                                                                                                                                                                                 | Page |
|-------------------------------------------------------------------------------------------------------------------------------------------------------------------------------------------------------------------------------------------------------------------------------------------------------------------|------|
| <b>Notes about “dihydrogen bonds”</b>                                                                                                                                                                                                                                                                             | 2    |
| <b>Table S1.</b> Distances between centers of masses of monomers in the corresponding dimers for MBD and D4 dispersion corrections, MBD dispersion interaction energy, D4 dispersion interaction energy and masses of monomers.                                                                                   | 2    |
| <b>Table S2.</b> Distances between centers of masses of the monomers in the corresponding dimers for MBD and D4 dispersion corrections, dispersion interaction energies $E_{\text{DISP}}$ for MBD and D4 dispersion corrections, products of masses of monomers and $M_1 \times M_2 / R_{\text{com-com}}$ values. | 3    |
| <b>Table S3.</b> Chirgwin-Coulson weights of di-zwitterionic VB structures of methane and tertiary-butyl dimers calculated with the VBSCF/6-31++G(d,p) and BOVB/6-31++G(d,p) methods.                                                                                                                             | 5    |
| <b>Table S4.</b> Ground-state Mulliken net atomic charges (a.u.) for the tertiary-butyl dimer calculated with PBE0-MBD/cc-pVTZ and PBE0/cc-pVTZ levels of theory.                                                                                                                                                 | 5    |
| <b>Table S5.</b> Ground-state Mulliken net atomic charges (a.u.) of dodecahedrane dimer calculated with the PBE-MBD/cc-pVTZ level of theory.                                                                                                                                                                      | 6    |
| <b>Figure S1.</b> Mulliken atomic charges (a.u.) of dodecahedrane dimer.                                                                                                                                                                                                                                          | 8    |
| <b>Figure S2.</b> Mulliken and Löwdin charges of the ionic valence bond (VB) structures $\Phi_8$ and $\Phi_9$ of dimer <b>1</b> calculated with VBSCF,BOVB/6-31++G(d,p) methods.                                                                                                                                  | 9    |
| <b>Figure S3.</b> Mulliken and Löwdin charges of ionic valence bond (VB) structures $\Phi_9$ of dimer <b>14</b> calculated with VBSCF,BOVB/6-31++G(d,p) methods.                                                                                                                                                  | 10   |
| <b>Figure S4.</b> Mulliken and Löwdin charges of ionic valence bond (VB) structures $\Phi_8$ of dimer <b>14</b> calculated with VBSCF/6-31++G(d,p) method.                                                                                                                                                        | 11   |
| <b>Figure S5.</b> Mulliken and Löwdin charges of ionic valence bond (VB) structures $\Phi_8$ and $\Phi_9$ of dimer <b>14</b> calculated by BOVB/6-31++G(d,p) method with 2 structures.                                                                                                                            | 12   |
| <b>Table S6.</b> MBD dimers dispersion interaction energy, MBD monomers dispersion interaction energy and $\Delta E_{\text{DISP}}$ values                                                                                                                                                                         | 13   |
| <b>Table S7.</b> Distances between centers of masses of the monomers in the dimers calculated with MBD correction, MBD dispersion interaction energy, mass of monomers, sum of mass of monomers and $M_1 + M_2 / R_{\text{com-com}}$ values                                                                       | 14   |
| <b>Figure S6.</b> Dependence of the total dispersion energy calculated with                                                                                                                                                                                                                                       | 15   |

Tkachenko's MBD correction on  $M_1+M_2/R_{\text{COM-COM}}$ , on  $M_1+M_2$  and on  $M_1 \times M_2$  for the entire set of the dimers.

|                                                                                                                                                                                                                                                                                                                 |    |
|-----------------------------------------------------------------------------------------------------------------------------------------------------------------------------------------------------------------------------------------------------------------------------------------------------------------|----|
| <b>Full citation</b> for Ref. 29.                                                                                                                                                                                                                                                                               | 16 |
| <b>Table S8.</b> Bond lengths between closest H atoms of the dimers calculated with MBD correction, MBD and D4 dispersion interaction energies.                                                                                                                                                                 | 17 |
| <b>Table S9.</b> Square of bond lengths between closest H atoms of the dimers ( $R_{\text{H-H}}^2$ ), square of distances between the respective centers of masses ( $R_{\text{com-com}}^2$ ), $E_{\text{DISP,MBD}}$ and $M_1 \times M_2 / R_{\text{H-H}}^2$ and $M_1 \times M_2 / R_{\text{com-com}}^2$ values | 17 |
| <b>Figure S7.</b> Dependence of the dispersion interaction energy on $M_1 \times M_2 / R_{\text{H-H}}^2$ (a) for 26 dimers and on $M_1 \times M_2 / R_{\text{COM-COM}}^2$ (b) for 40 dimers                                                                                                                     | 19 |
| <b>Table S10.</b> Bond lengths between closest H atoms of the dimers, dispersion interaction energies of dimers, product of masses of monomers and $M^2/R_{\text{H-H}}$                                                                                                                                         | 19 |
| <b>Figure S8.</b> Dependence of the dispersion interaction energy on $M_1 \times M_2 / R_{\text{H-H}}$ for 26 dimers                                                                                                                                                                                            | 20 |
| <b>Cartesian Coordinates</b> of investigated dimers in Å optimized by PBE0-MBD/cc-pVTZ                                                                                                                                                                                                                          | 20 |

### Notes about "dihydrogen bonds"

The term "dihydrogen bonds" was proposed by Crabtree et al. (*J. Am. Chem. Soc.* **1995**, 117, 12875-12876) for the interactions between two hydrogen atoms of opposite polarity, i.e., one with protonic and another with hydridic character. On the other hand, Matta et al. (*J. Phys. Chem. A*, **2011**, 115, 12451-12458) point out that «the non electrostatic interaction between two closed-shell neutral (or close to neutral) hydrogen atoms has been termed hydrogen-hydrogen (or H-H) interaction to distinguish it from the dihydrogen bond», providing abundant references for the two cases. We have also referred to this case as "homopolar H···H interactions" or "homopolar dihydrogen interactions": Echeverría, J. et al. *Phys. Chem. Chem. Phys.* **2017**, 19, 28044-28055; Echeverría, J.; Alvarez, S. *Chem. Sci.* **2023**, 14, 11647-11688.

**Table S1.** Distances between centers of masses of monomers in the corresponding dimers ( $R_{\text{com-com}}$ , in Å) calculated with MBD and D4 dispersion corrections, MBD dispersion interaction energies<sup>a</sup> ( $E_{\text{DISP,MBD}}$ , in au), D4 dispersion interaction energies<sup>a</sup> ( $E_{\text{DISP,D4}}$ , in au) and masses of monomers ( $M_1, M_2$  in amu)<sup>b</sup>

|   | $R_{\text{com-com}}$<br>MBD | $R_{\text{com-com}}$<br>D4 | $E_{\text{DISP,MBD}}$ | $E_{\text{DISP,D4}}$ | $M_1(\text{amu})$ | $M_2(\text{amu})$ |
|---|-----------------------------|----------------------------|-----------------------|----------------------|-------------------|-------------------|
| 1 | 4.6025                      | 4.6025                     | -0.00208376           | -0.0017843           | 16.04236          |                   |
| 2 | 5.3501                      | 5.3502                     | -0.00217864           | -0.0020411           | 34.0330           |                   |
| 3 | 5.7358                      | 5.7358                     | -0.00221213           | -0.0024345           | 52.02258          |                   |
| 4 | 5.5752                      | 5.5751                     | -0.00265807           | -0.0030396           | 32.1170           |                   |
| 5 | 4.0619                      | 4.0619                     | -0.00232540           | -0.0020229           | 16.04236          |                   |
| 6 | 3.6367                      | 3.6367                     | -0.00262624           | -0.0022921           | 16.04236          |                   |
| 7 | 5.0789                      | 5.1038                     | -0.00549617           | -0.0050074           | 30.06904          |                   |
| 8 | 5.8529                      | 5.8525                     | -0.00592966           | -0.0068412           | 58.299            |                   |
| 9 | 6.0263                      | 6.0261                     | -0.00670277           | -0.0089262           | 62.218            |                   |

|    |        |        |             |             |           |           |
|----|--------|--------|-------------|-------------|-----------|-----------|
| 10 | 6.2911 | 6.2911 | -0.00994873 | -0.0093020  | 44.09572  |           |
| 11 | 6.7596 | 6.7596 | -0.01051204 | -0.0115907  | 60.1710   |           |
| 12 | 6.8738 | 6.8738 | -0.01071294 | -0.0136797  | 77.3405   |           |
| 13 | 5.0887 | 5.0887 | -0.01028948 | -0.0096433  | 44.09572  |           |
| 14 | 5.0432 | 5.0669 | -0.01641880 | -0.0156177  | 58.12240  |           |
| 15 | 6.3857 | 6.3857 | -0.00726311 | -0.0075335  | 52.07536  |           |
| 16 | 7.1261 | 7.1261 | -0.02742006 | -0.0292114  | 104.15072 |           |
| 17 | 7.3228 | 7.3227 | -0.05584619 | -0.0560462  | 136.238   |           |
| 18 | 7.2144 | 7.2144 | -0.01492743 | -0.0190080  | 78.11184  |           |
| 19 | 6.8083 | 6.8083 | -0.01573593 | -0.0168938  | 78.11184  |           |
| 20 | 7.3773 | 7.3776 | -0.04170417 | -0.0435226  | 130.901   |           |
| 21 | 7.7377 | 7.7378 | -0.05575758 | -0.0579044  | 156.2237  |           |
| 22 | 8.1498 | 8.1498 | -0.06796890 | -0.0708924  | 182.2610  |           |
| 23 | 8.4719 | 8.4720 | -0.12338109 | -0.1293960  | 260.3728  |           |
| 24 | 6.5801 | 6.5801 | -0.01150023 | -0.0121986  | 78.11184  | 52.07536  |
| 25 | 5.5982 | 5.5978 | -0.00593488 | -0.0054693  | 44.09572  | 16.04236  |
| 26 | 6.1510 | 6.1509 | -0.01880351 | -0.0193925  | 44.09572  | 104.15072 |
| 27 | 7.1169 | 7.1168 | -0.00856597 | -0.0111620  | 77.3405   | 62.218    |
| 28 | 5.1344 | 5.1344 | -0.01080644 | -0.0101855  | 58.12240  | 30.06904  |
| 29 | 4.7987 | 4.7986 | -0.01068687 | -0.0100787  | 44.09572  |           |
| 30 | 5.4266 | 5.4265 | -0.01012972 | -0.0095448  | 44.09572  |           |
| 31 | 4.8789 | 4.8771 | -0.02129390 | -0.0202527  | 73.0063   |           |
| 32 | 5.6750 | 5.6740 | -0.02089291 | -0.0198782  | 73.0063   |           |
| 33 | 4.9441 | 4.9437 | -0.03221595 | -0.0307239  | 100.20194 |           |
| 34 | 5.8017 | 5.8017 | -0.03208576 | -0.0305663  | 100.20194 |           |
| 35 | 4.0594 | 4.0594 | -0.01765028 | -0.0226434  | 78.11184  |           |
| 36 | 4.0623 | 4.0622 | -0.00370992 | -0.0041835  | 28.05316  |           |
| 37 | 4.2555 | 4.2449 | -0.00995313 | -0.01249564 | 78.11184  | 28.05316  |
| 38 | 3.0525 | 3.0738 | -0.00008740 | -0.00007678 | 20.1797   |           |
| 39 | 3.6638 | 3.6650 | -0.00028862 | -0.00042516 | 39.9480   |           |
| 40 | 2.7400 | 2.7975 | -0.00001016 | -0.00002743 | 4.00260   |           |

a) Calculated with cc-pVTZ basis set. b) Calculated with the following masses of the corresponding atoms: C=12.0107 amu, H=1.00794 amu, F=18.998 amu, Si=28.085 amu, He=4.0026 amu, Ne=20.1797 amu, Ar=39.9480 amu.

**Table S2.** Distances between centers of masses in the corresponding dimers ( $R_{\text{com-com}}$ , in Å) calculated with MBD and D4 dispersion corrections, dispersion interaction energies ( $E_{\text{DISP}}$ , kcal/mol)<sup>a</sup> for MBD and D4 dispersion corrections, products of monomers masses<sup>b</sup> ( $M_1 \times M_2$ , in amu) and  $M_1 \times M_2 / R_{\text{com-com}}$  values (when the MBD/ $R_{\text{com-com}}$  and D4/ $R_{\text{com-com}}$  values are not coincident, the MBD value is given first and the D4 value below it).

|   | $R_{\text{com-com}}$<br>MBD | $R_{\text{com-com}}$<br>D4 | $E_{\text{DISP,MBD}}$ | $E_{\text{DISP,D4}}^c$ | $M_1 \times M_2$ | $M_1 \times M_2 / R_{\text{com-com}}^d$ |
|---|-----------------------------|----------------------------|-----------------------|------------------------|------------------|-----------------------------------------|
| 1 | 4.6025                      | 4.6025                     | -1.31                 | -1.12 (-1.12)          | 257.357314       | 55.91685                                |
| 2 | 5.3501                      | 5.3502                     | -1.37                 | -1.28 (-1.28)          | 1158.24509       | 216.49034<br>216.4863183                |
| 3 | 5.7358                      | 5.7358                     | -1.39                 | -1.53 (-1.53)          | 2706.34883       | 471.83459                               |
| 4 | 5.5752                      | 5.5751                     | -1.67                 | -1.91 (-1.91)          | 1031.50169       | 185.01609<br>185.019406                 |

|    |        |        |         |                 |             |                            |
|----|--------|--------|---------|-----------------|-------------|----------------------------|
| 5  | 4.0619 | 4.0619 | -1.46   | -1.27           | 257.357314  | 63.35885                   |
| 6  | 3.6367 | 3.6367 | -1.65   | -1.44           | 257.357314  | 70.76671                   |
| 7  | 5.1038 | 5.1038 | -3.45   | -3.14           | 904.147167  | 177.151763                 |
| 8  | 5.8529 | 5.8525 | -3.73   | -4.29           | 3398.77340  | 580.69904<br>580.738727    |
| 9  | 6.0263 | 6.0261 | -4.21   | -5.60           | 3871.07952  | 642.36422<br>642.3855429   |
| 10 | 6.2911 | 6.2911 | -6.24   | -5.84           | 1944.43252  | 309.0767                   |
| 11 | 6.7596 | 6.7596 | -6.60   | -7.27           | 3620.54924  | 535.61590                  |
| 12 | 6.8738 | 6.8738 | -6.72   | -8.58 (-8.58)   | 5981.55294  | 870.19595                  |
| 13 | 5.0887 | 5.0887 | -6.46   | -6.05 (-6.05)   | 1944.43252  | 382.1079                   |
| 14 | 5.0432 | 5.0669 | -10.30  | -9.80 (-9.80)   | 3378.21338  | 669.8551<br>666.7219365    |
| 15 | 6.3857 | 6.3857 | -4.55   | -4.73 (-4.73)   | 2711.84312  | 424.6744                   |
| 16 | 7.1261 | 7.1261 | -17.21  | -18.33 (-18.3)  | 10847.3724  | 1522.2032                  |
| 17 | 7.3228 | 7.3227 | -35.04  | -35.17 (-35.2)  | 18560.79264 | 2534.6579<br>2534.692482   |
| 18 | 7.2144 | 7.2144 | -9.37   | -11.93 (-11.9)  | 6101.45330  | 845.7326                   |
| 19 | 6.8083 | 6.8083 | -9.87   | -10.60 (-10.6)  | 6101.45330  | 896.1787                   |
| 20 | 7.3773 | 7.3776 | -26.17  | -27.31 (-27.3)  | 17135.0718  | 2322.6752<br>2322.580758   |
| 21 | 7.7377 | 7.7378 | -34.99  | -36.34 (-36.3)  | 24405.84444 | 3154.1472<br>3154.106392   |
| 22 | 8.1498 | 8.1498 | -42.65  | -44.49 (-44.5)  | 33219.07212 | 4076.0598                  |
| 23 | 8.4719 | 8.4720 | -77.42  | -81.20 (-81.20) | 67793.99498 | 8002.2185<br>8002.124053   |
| 24 | 6.5801 | 6.5801 | -7.22   | -7.65           | 4067.702188 | 618.18243                  |
| 25 | 5.5982 | 5.5978 | -3.72   | -3.43           | 707.3994147 | 126.36194<br>126.3709698   |
| 26 | 6.1510 | 6.1509 | -11.80  | -12.17          | 4592.600987 | 746.642983<br>746.65512215 |
| 27 | 7.1169 | 7.1168 | -5.38   | -7.00           | 4811.971229 | 676.133040<br>676.14254    |
| 28 | 5.1344 | 5.1344 | -6.78   | -6.39           | 1747.684771 | 340.387342                 |
| 29 | 4.7987 | 4.7986 | -6.71   | -6.32 (-6.32)   | 1944.423703 | 405.19801<br>405.206457    |
| 30 | 5.4266 | 5.4265 | -6.36   | -5.99 (-5.99)   | 1944.423703 | 358.313438<br>358.320041   |
| 31 | 4.8789 | 4.8771 | -13.36  | -12.71 (-12.7)  | 5329.91984  | 1092.442936<br>1092.846126 |
| 32 | 5.6750 | 5.6740 | -13.11  | -12.47 (-12.5)  | 5329.91984  | 939.1929233<br>939.3584491 |
| 33 | 4.9441 | 4.9437 | -20.22  | -19.28 (-19.3)  | 10040.42878 | 2030.789988<br>2030.954301 |
| 34 | 5.8017 | 5.8016 | -20.13  | -19.18 (-19.2)  | 10040.42878 | 1730.601165<br>1730.630995 |
| 35 | 4.0594 | 4.0594 | -11.076 | -14.21 (-14.2)  | 6101.459548 | 1503.044674<br>1503.044674 |
| 36 | 4.0623 | 4.0622 | -2.328  | -2.63           | 786.979786  | 193.7290692                |

|    |        |        |         |               |             |                            |
|----|--------|--------|---------|---------------|-------------|----------------------------|
|    |        |        |         |               |             | 193.7324076                |
| 37 | 4.2555 | 4.2449 | -6.245  | -7.84 (-7.84) | 2191.283945 | 514.9298427<br>516.215681  |
| 38 | 3.0524 | 3.0738 | -0.055  | -0.048        | 407.2202921 | 133.404627<br>132.481063   |
| 39 | 3.6638 | 3.6650 | -0.181  | -0.27         | 1595.842704 | 435.5703652<br>435.4277501 |
| 40 | 2.7400 | 2.7400 | -0.0064 | -0.0172       | 16.02080678 | 5.847                      |

a) Calculated with cc-pVTZ basis set. b) Calculated with the following masses of the corresponding atoms: C=12.0107 amu, H=1.00794 amu, F=18.998 amu, Si=28.085 amu, He=4.0026 amu, Ne=20.1797 amu, Ar=39.9480 amu. c) In parentheses are the results for pairwise-only D4 calculations. d) The numbers in the second line corresponds to D4 result

**Table S3.** Chirgwin-Coulson weights ( $\omega$ ) of the VB structures of methane and tertiary-butyl dimers calculated with VBSCF/6-31++G(d,p) and BOVB/6-31++G(d,p) methods

| structure                                                                  | H <sub>3</sub> C-H---H-CH <sub>3</sub> |                        | (H <sub>3</sub> C) <sub>3</sub> C-H---H-C(CH <sub>3</sub> ) <sub>3</sub> |                        |
|----------------------------------------------------------------------------|----------------------------------------|------------------------|--------------------------------------------------------------------------|------------------------|
|                                                                            | $\omega_{\text{VBSCF}}$                | $\omega_{\text{BOVB}}$ | $\omega_{\text{VBSCF}}$                                                  | $\omega_{\text{BOVB}}$ |
| $\Phi_1$ (C <sup>-</sup> ·H --- H <sup>·</sup> ·C)                         | 0.544                                  | 0.627                  | 0.543                                                                    | 0.630                  |
| $\Phi_8$ (C <sup>+</sup> ·H --- H <sup>+</sup> ·C)                         | 0.019                                  | 0.080                  | 0.022                                                                    | 0.064                  |
| $\Phi_9$ (C <sup>-</sup> <sup>+</sup> H --- H <sup>-</sup> <sup>+</sup> C) | 0.019                                  | 0.080                  | 0.022                                                                    | 0.064                  |
| $\Phi_6$ (C <sup>+</sup> ·H --- H <sup>-</sup> <sup>+</sup> C)             | 0.004                                  | 0.029                  | 0.006                                                                    | -0.022                 |
| $\Phi_7$ (C <sup>-</sup> <sup>+</sup> H --- H <sup>+</sup> ·C)             | 0.026                                  | 0.020                  | 0.019                                                                    | 0.027                  |

**Table S4.** Ground-state Mulliken net atomic charges (au) of the tertiary-butyl dimer calculated with PBE0-MBD/cc-pVTZ and PBE0/cc-pVTZ levels of theory

| Atom | PBE0<br>Dimer | PBE0-MBD<br>dimer | PBE0-MBD<br>monomer |
|------|---------------|-------------------|---------------------|
| 1 C  | -0.077188     | <b>-0.077538</b>  | -0.053505           |
| 2 H  | 0.110160      | <b>0.110385</b>   | 0.085687            |
| 3 C  | -0.293823     | -0.293969         | -0.291303           |
| 4 H  | 0.110159      | <b>0.110385</b>   |                     |
| 5 C  | -0.077188     | <b>-0.077538</b>  |                     |
| 6 C  | -0.293823     | -0.293969         |                     |
| 7 H  | 0.090132      | 0.090183          | 0.089330            |
| 8 H  | 0.096326      | 0.096386          | 0.095659            |
| 9 H  | 0.096362      | 0.096422          | 0.095691            |
| 10 H | 0.090133      | 0.090183          |                     |
| 11 H | 0.096362      | 0.096422          |                     |
| 12 H | 0.096326      | 0.096386          |                     |
| 13 C | -0.292778     | -0.292836         | -0.290874           |
| 14 H | 0.089849      | 0.089928          | 0.089311            |
| 15 H | 0.095696      | 0.095752          | 0.095160            |
| 16 H | 0.096251      | 0.096258          | 0.095623            |
| 17 C | -0.292778     | -0.292836         |                     |
| 18 H | 0.095696      | 0.095752          |                     |

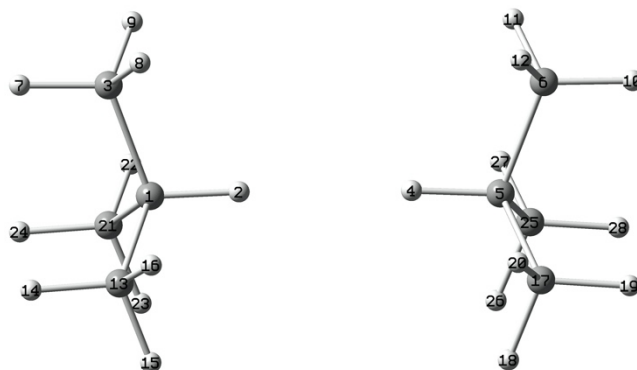

|      |           |           |           |
|------|-----------|-----------|-----------|
| 19 H | 0.089849  | 0.089928  |           |
| 20 H | 0.096251  | 0.096258  |           |
| 21 C | -0.292788 | -0.292967 | -0.290946 |
| 22 H | 0.095919  | 0.096011  | 0.095347  |
| 23 H | 0.095943  | 0.095993  | 0.095426  |
| 24 H | 0.089941  | 0.089993  | 0.089366  |
| 25 C | -0.292788 | -0.292967 |           |
| 26 H | 0.095943  | 0.095993  |           |
| 27 H | 0.095919  | 0.096011  |           |
| 28 H | 0.089941  | 0.089993  |           |

-----  
Sum of atomic charges = 0.000000

**Table S5.** Ground-state Mulliken net atomic charges (au) of dodecahedrane dimer calculated with PBE-MBD/cc-pVTZ level of theory

| Atom | PBE0-MBD<br>Dimer | PBE0-MBD<br>monomer |
|------|-------------------|---------------------|
| 1 C  | -0.088538         | -0.088573           |
| 2 C  | -0.090281         | -0.089371           |
| 3 H  | 0.088580          | 0.088601            |
| 4 H  | 0.088579          | 0.088630            |
| 5 C  | -0.102629         | -0.088649           |
| 6 C  | -0.091302         | -0.090707           |
| 7 H  | 0.089235          | 0.088524            |
| 8 H  | 0.088417          | 0.088519            |
| 9 C  | -0.089399         | -0.088612           |
| 10 C | -0.091426         | -0.090627           |
| 11 H | 0.088554          | 0.088600            |
| 12 H | 0.088465          | 0.088513            |
| 13 C | -0.088865         | -0.088540           |
| 14 C | -0.089227         | -0.089344           |
| 15 H | 0.088602          | 0.088594            |
| 16 H | 0.088664          | 0.088656            |
| 17 C | -0.088373         | -0.087614           |
| 18 H | 0.088501          | 0.088564            |
| 19 C | -0.087969         | -0.087645           |
| 20 H | 0.088585          | 0.088577            |
| 21 C | -0.087549         | -0.087589           |
| 22 H | 0.088552          | 0.088569            |
| 23 C | -0.101661         | -0.087796           |
| 24 H | 0.089173          | 0.088514            |
| 25 C | -0.098735         | -0.085430           |
| 26 H | 0.089330          | 0.088794            |
| 27 C | -0.088472         | -0.088526           |
| 28 H | 0.088664          | 0.088675            |
| 29 C | -0.085633         | -0.085314           |
| 30 H | 0.088848          | 0.088841            |
| 31 C | -0.089476         | -0.088597           |
| 32 H | 0.088577          | 0.088668            |

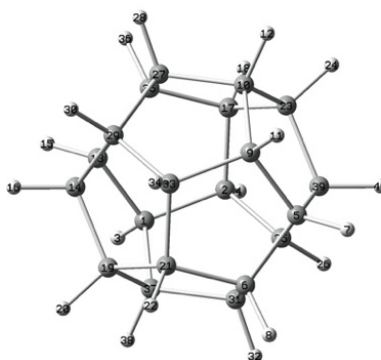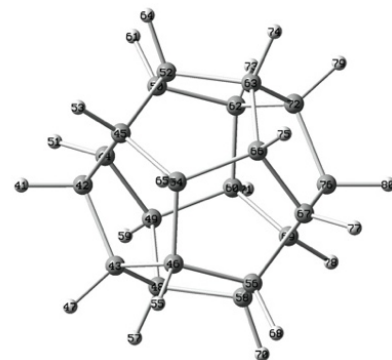

|           |          |                  |                  |
|-----------|----------|------------------|------------------|
| 33        | C        | -0.089342        | -0.089361        |
| 34        | H        | 0.088627         | 0.088642         |
| 35        | C        | -0.090614        | -0.090686        |
| 36        | H        | 0.088506         | 0.088523         |
| 37        | C        | -0.090520        | -0.090593        |
| 38        | H        | 0.088501         | 0.088518         |
| <b>39</b> | <b>C</b> | <b>-0.089706</b> | <b>-0.088835</b> |
| <b>40</b> | <b>H</b> | <b>0.134763</b>  | <b>0.088883</b>  |
| <b>41</b> | <b>H</b> | <b>0.134743</b>  |                  |
| <b>42</b> | <b>C</b> | <b>-0.089654</b> |                  |
| 43        | C        | -0.101702        |                  |
| 44        | C        | -0.102560        |                  |
| 45        | C        | -0.098747        |                  |
| 46        | C        | -0.088329        |                  |
| 47        | H        | 0.089183         |                  |
| 48        | C        | -0.091366        |                  |
| 49        | C        | -0.089470        |                  |
| 50        | C        | -0.091373        |                  |
| 51        | H        | 0.089223         |                  |
| 52        | C        | -0.089427        |                  |
| 53        | H        | 0.089328         |                  |
| 54        | C        | -0.090341        |                  |
| 55        | H        | 0.088498         |                  |
| 56        | C        | -0.090669        |                  |
| 57        | H        | 0.088466         |                  |
| 58        | C        | -0.088469        |                  |
| 59        | H        | 0.088555         |                  |
| 60        | C        | -0.089359        |                  |
| 61        | H        | 0.088418         |                  |
| 62        | C        | -0.087528        |                  |
| 63        | C        | -0.090449        |                  |
| 64        | H        | 0.088571         |                  |
| 65        | H        | 0.088583         |                  |
| 66        | C        | -0.088621        |                  |
| 67        | C        | -0.088785        |                  |
| 68        | H        | 0.088506         |                  |
| 69        | C        | -0.085638        |                  |
| 70        | H        | 0.088668         |                  |
| 71        | H        | 0.088621         |                  |
| 72        | C        | -0.088007        |                  |
| 73        | H        | 0.088551         |                  |
| 74        | H        | 0.088496         |                  |
| 75        | H        | 0.088586         |                  |
| 76        | C        | -0.089204        |                  |
| 77        | H        | 0.088594         |                  |
| 78        | H        | 0.088848         |                  |
| 79        | H        | 0.088591         |                  |
| 80        | H        | 0.088668         |                  |

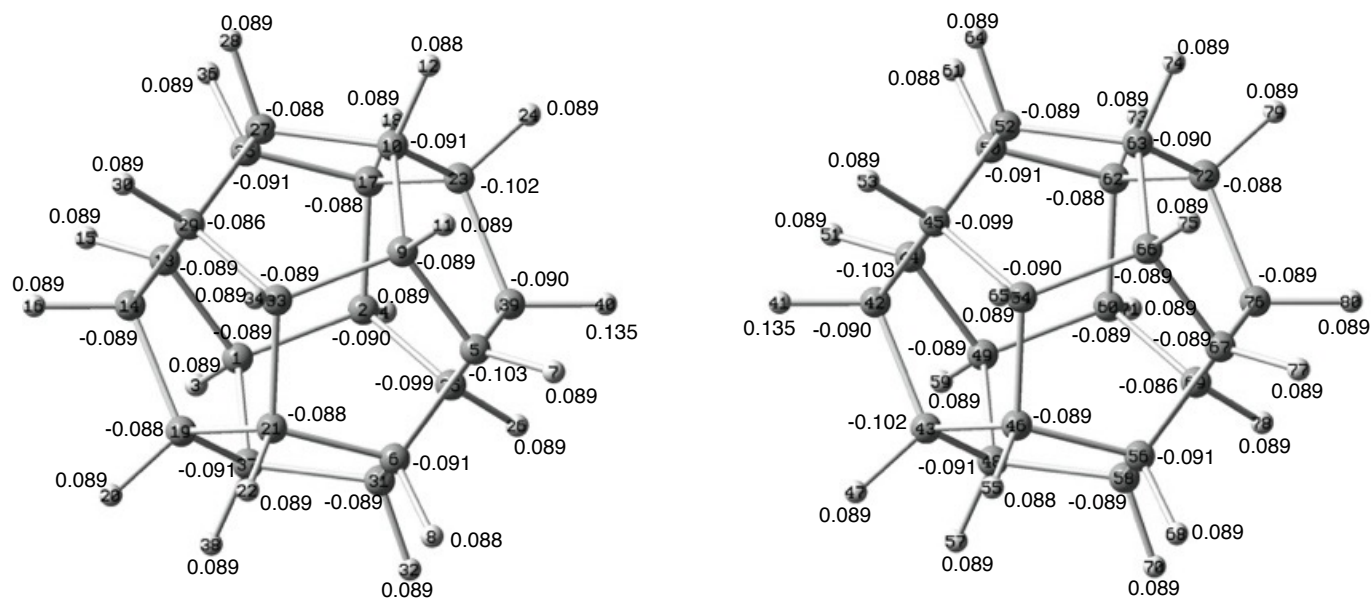

**Figure S1.** Mulliken atomic charges (au) in the dodecahedrane dimer.



**Ionic structure  $\Phi_9$  used for VBSCF calculations**

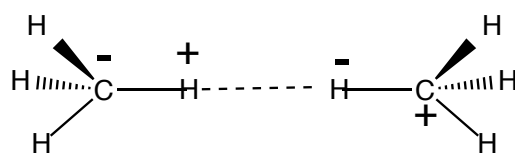

**Lowdin charges at geometry optimized with MBD corrections (H-H=2.425Å)**

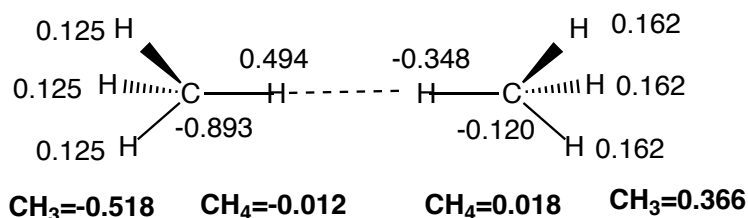

**Mulliken charges at geometry optimized with MBD corrections (H-H=2.425Å)**

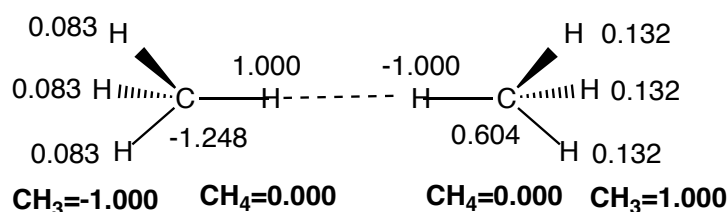

**Two ionic structures ( $\Phi_8$  and  $\Phi_9$ ) used for VBSCF calculations. In parentheses BOVB**

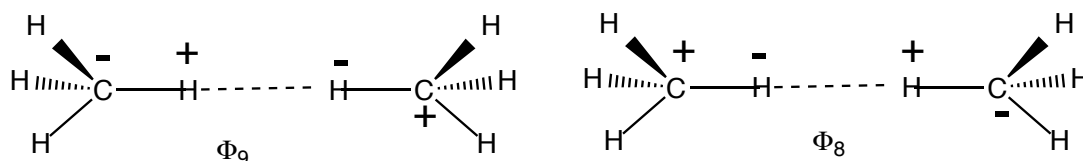

**Lowdin charges at geometry optimized with MBD corrections (H-H=2.425Å)**

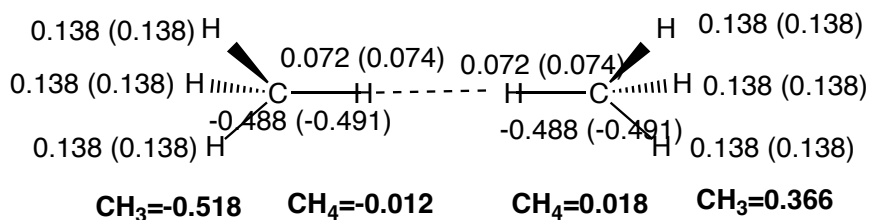

**Mulliken charges at geometry optimized with MBD corrections (H-H=2.425Å)**

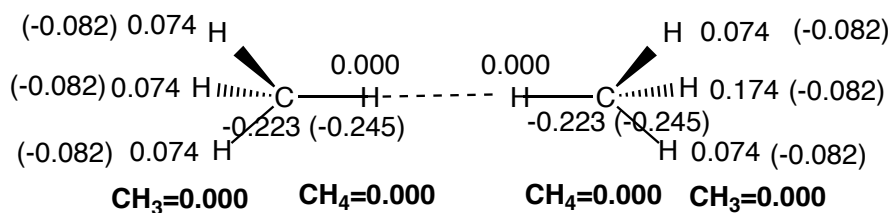

**Figure S2.** Mulliken and Löwdin charges of the ionic valence bond (VB) structures  $\Phi_8$  and  $\Phi_9$  of dimer **1** calculated by VBSCF/6-31++G(d,p) and BOVB/6-31++G(d,p) methods

Ionic structure  $\Phi_9$  used for VBSCF calculations

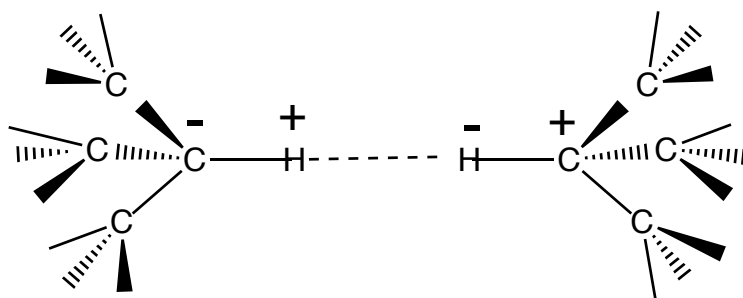

Lowdin charges at geometry optimized with MBD corrections (H-H=2.125Å)

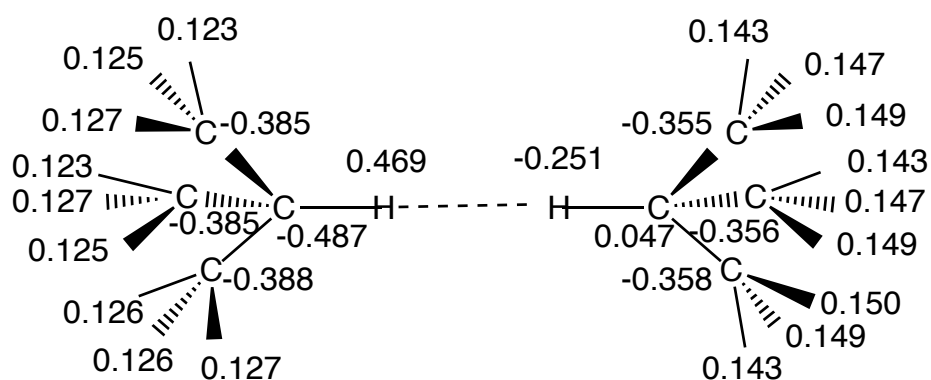

(CH<sub>3</sub>)<sub>3</sub>C=-0.516    (CH<sub>3</sub>)<sub>3</sub>CH=-0.047    (CH<sub>3</sub>)<sub>3</sub>CH=0.047    (CH<sub>3</sub>)<sub>3</sub>C=0.298

Mulliken charges at geometry optimized with MBD corrections (H-H=2.125Å)

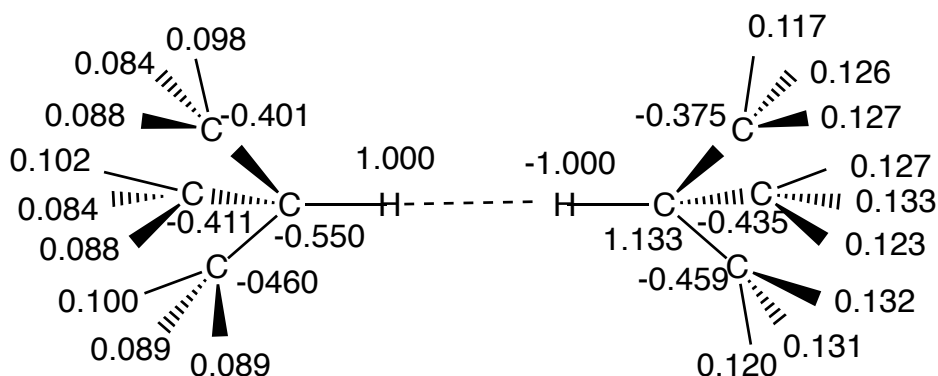

(CH<sub>3</sub>)<sub>3</sub>C=-1.000    (CH<sub>3</sub>)<sub>3</sub>CH=0.000    (CH<sub>3</sub>)<sub>3</sub>CH=0.000    (CH<sub>3</sub>)<sub>3</sub>C=1.000

**Figure S3.** Mulliken and Löwdin charges of ionic valence bond (VB) structures  $\Phi_9$  of dimer **14** calculated by VBSCF/6-31++G(d,p) method

**Ionic structure  $\Phi_8$  used for VBSCF calculations**

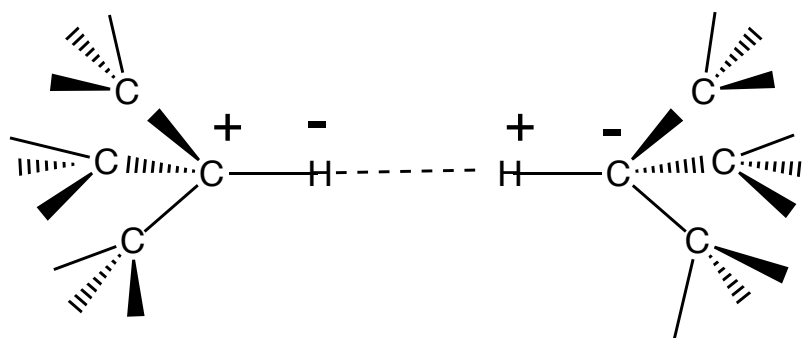

**Lowdin charges at geometry optimized with MBD corrections (H-H=2.125Å)**

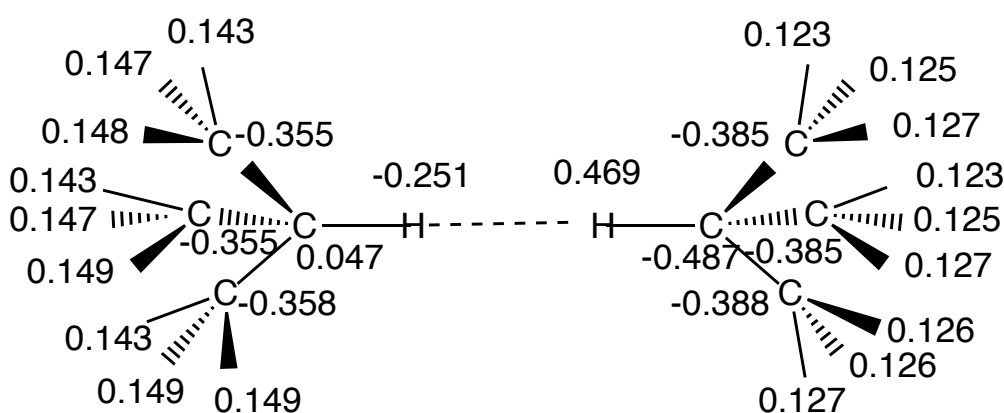

**(CH<sub>3</sub>)<sub>3</sub>C=0.298    (CH<sub>3</sub>)<sub>3</sub>CH=0.047    (CH<sub>3</sub>)<sub>3</sub>CH=-0.049    (CH<sub>3</sub>)<sub>3</sub>C=-0.518**

**Mulliken charges at geometry optimized with MBD corrections (H-H=2.125Å)**

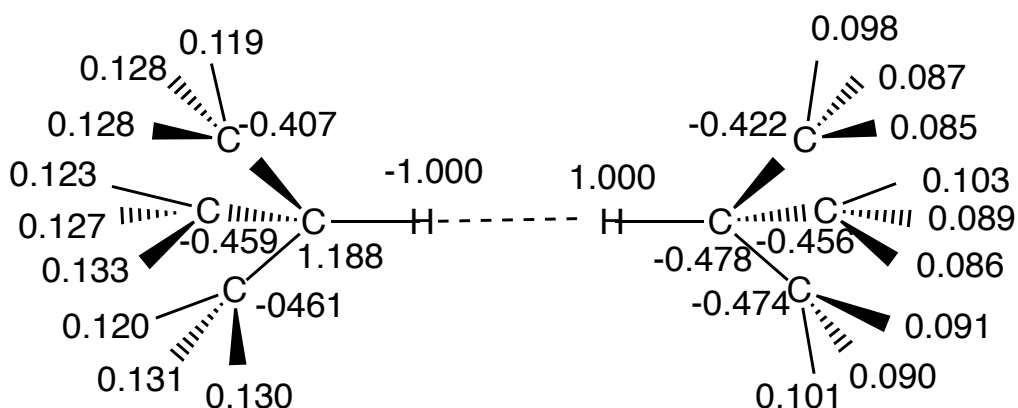

**(CH<sub>3</sub>)<sub>3</sub>C= 1.000    (CH<sub>3</sub>)<sub>3</sub>CH=0.000    (CH<sub>3</sub>)<sub>3</sub>CH=0.000    (CH<sub>3</sub>)<sub>3</sub>C= -1.000**

**Figure S4.** Mulliken and Löwdin charges of ionic valence bond (VB) structures  $\Phi_8$  of dimer **14** calculated by VBSCF/6-31++G(d,p) method

**Ionic structures  $\Phi_8$  and  $\Phi_9$  used for VBSCF calculations**

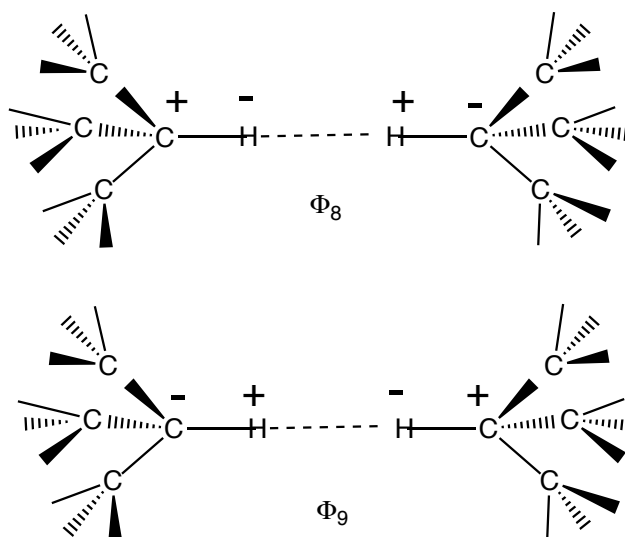

**Lowdin charges at geometry optimized with MBD corrections (H-H=2.125Å)**

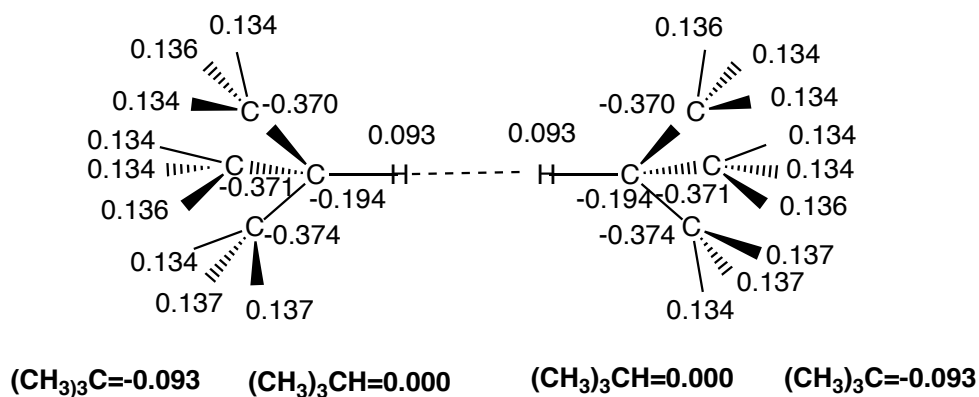

**Mulliken charges at geometry optimized with MBD corrections (H-H=2.125Å)**

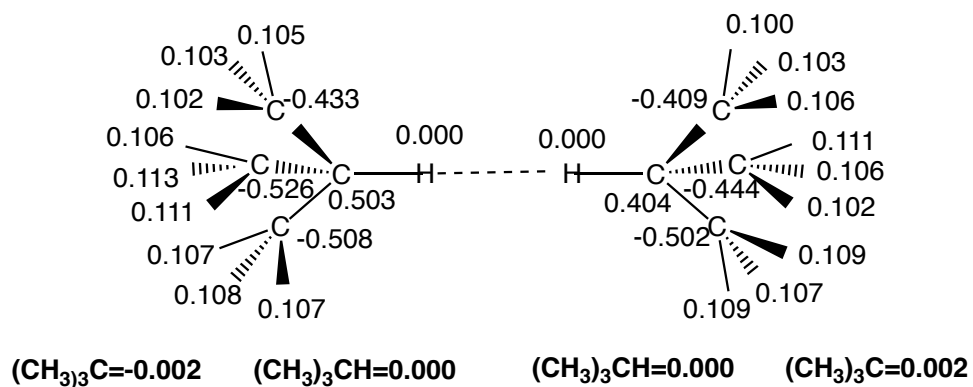

**Figure S5.** Mulliken and Löwdin charges of ionic valence bond (VB) structures  $\Phi_8$  and  $\Phi_9$  of dimer **14** calculated by BOVB/6-31++G(d,p) method with 2 structures.

**Table S6.** MBD dispersion interaction energy in dimers ( $E_{\text{DISP}}(\text{dimers})$ , in au and kcal/mol),<sup>a</sup> MBD dispersion energy in monomers ( $E_{\text{DISP}}(\text{monomer})$ , in au),<sup>a</sup>  $\Delta E_{\text{DISP}} = E_{\text{DISP}}(\text{dimer}) - 2E_{\text{DISP}}(\text{monomer})$  (in au and kcal/mol).

|    | $E_{\text{DISP,MBD}}$<br>(dimers)<br>au | $E_{\text{DISP,MBD}}$<br>(dimers)<br>kcal/mol | $E_{\text{DISP,MBD}}$<br>(monomer)<br>au             | $\Delta E_{\text{DISP}}$ ,<br>au                   | $\Delta E_{\text{DISP}}$<br>kcal/mol       | $\Delta E_{\text{DISP}}^c$<br>au |
|----|-----------------------------------------|-----------------------------------------------|------------------------------------------------------|----------------------------------------------------|--------------------------------------------|----------------------------------|
| 1  | -0.00208376                             | -1.31                                         | -0.000828028                                         | -0.0004277                                         | -0.268                                     | -0.0005596                       |
| 2  | -0.00217864                             | -1.37                                         | -0.000884155                                         | -0.0004103                                         | -0.258                                     | -0.0004293                       |
| 3  | -0.00221213                             | -1.39                                         | -0.000959501                                         | -0.0002931                                         | -0.183                                     | -0.0001537                       |
| 4  | -0.00265807                             | -1.67                                         | -0.001083450                                         | -0.0004912                                         | -0.308                                     | -0.0006738                       |
| 5  | -0.00232540                             | -1.46                                         | -0.000827732                                         | -0.0006699                                         | -0.420                                     | -0.0008392                       |
| 6  | -0.00262624                             | -1.65                                         | -0.000827946                                         | -0.0009703                                         | -0.609                                     | -0.0012503                       |
| 7  | -0.00549617                             | -3.45                                         | -0.002411496                                         | -0.0006950                                         | -0.436                                     |                                  |
| 8  | -0.00592966                             | -3.73                                         | -0.002643447                                         | -0.0006428                                         | -0.403                                     |                                  |
| 9  | -0.00670277                             | -4.21                                         | -0.002917356                                         | -0.0008681                                         | -0.545                                     |                                  |
| 10 | -0.00994873                             | -6.24                                         | -0.004579206                                         | -0.0007903                                         | -0.496                                     |                                  |
| 11 | -0.01051204                             | -6.60                                         | -0.004887285                                         | -0.0007375                                         | -0.463                                     |                                  |
| 12 | -0.01071294                             | -6.72                                         | -0.004884749                                         | -0.0009434                                         | -0.592                                     |                                  |
| 13 | -0.01028948                             | -6.46                                         | -0.004576332                                         | -0.0012569                                         | -0.789                                     |                                  |
| 14 | -0.01641880                             | -10.30                                        | -0.007353235                                         | -0.0017124                                         | -1.075                                     | -0.0015207                       |
| 15 | -0.00726311                             | -4.55                                         | -0.003285428                                         | -0.0006923                                         | -0.435                                     |                                  |
| 16 | -0.02742006                             | -17.21                                        | -0.013136080                                         | -0.0011479                                         | -0.720                                     |                                  |
| 17 | -0.05584619                             | -35.04                                        | -0.026858773                                         | -0.0021288                                         | -1.336                                     |                                  |
| 18 | -0.01492743                             | -9.37                                         | -0.006960942                                         | -0.0010552                                         | -0.662                                     |                                  |
| 19 | -0.01573593                             | -9.87                                         | -0.007395117                                         | -0.0009457                                         | -0.593                                     |                                  |
| 20 | -0.04170417                             | -26.17                                        | -0.020110266                                         | -0.0014836                                         | -0.931                                     |                                  |
| 21 | -0.05575758                             | -34.99                                        | -0.026968242                                         | -0.0018211                                         | -1.143                                     |                                  |
| 22 | -0.06796890                             | -42.65                                        | -0.032891461                                         | -0.0021860                                         | -1.372                                     |                                  |
| 23 | -0.12338109                             | -77.42                                        | -0.06020703 <sup>b</sup><br>-0.06020233 <sup>c</sup> | -0.0029670 <sup>b</sup><br>-0.0029717 <sup>c</sup> | -1.862 <sup>b</sup><br>-1.865 <sup>c</sup> |                                  |
| 24 | -0.01150023                             | -7.22                                         | -0.010663566 <sup>d</sup>                            | -0.0008367                                         | -0.525                                     |                                  |
| 25 | -0.00593488                             | -3.72                                         | -0.005402137 <sup>d</sup>                            | -0.0005327                                         | -0.334                                     |                                  |
| 26 | -0.01880351                             | -11.80                                        | -0.016696186 <sup>d</sup>                            | -0.0021073                                         | -1.322                                     |                                  |
| 27 | -0.00856597                             | -5.38                                         | -0.007789613 <sup>d</sup>                            | -0.0007764                                         | -0.487                                     |                                  |
| 28 | -0.01080644                             | -6.78                                         | -0.009750133 <sup>d</sup>                            | -0.0010564                                         | -0.663                                     |                                  |
| 29 | -0.01068687                             | -6.71                                         | -0.004565975                                         | -0.0015549                                         | -0.976                                     |                                  |
| 30 | -0.01012972                             | -6.36                                         | -0.004565115                                         | -0.0009995                                         | -0.627                                     |                                  |
| 31 | -0.02129390                             | -13.36                                        | -0.009280634                                         | -0.0023316                                         | -1.463                                     |                                  |
| 32 | -0.02089291                             | -13.11                                        | -0.009288666                                         | -0.0023156                                         | -1.453                                     |                                  |
| 33 | -0.03221595                             | -20.22                                        | -0.014105688                                         | -0.0040046                                         | -2.513                                     |                                  |
| 34 | -0.03208576                             | -20.13                                        | -0.014106853                                         | -0.0038721                                         | -2.430                                     |                                  |
| 35 | -0.01765028                             | -11.076                                       | -0.006958157                                         | -0.0037340                                         | -2.343                                     |                                  |
| 36 | -0.00370992                             | -2.328                                        | -0.001397514                                         | -0.0009149                                         | -0.574                                     |                                  |
| 37 | -0.00995313                             | -6.245                                        | -0.008347914 <sup>d</sup>                            | -0.0016052                                         | -1.007                                     |                                  |
| 38 | -0.00008740                             | -0.055                                        |                                                      |                                                    |                                            |                                  |
| 39 | -0.00028862                             | -0.181                                        |                                                      |                                                    |                                            |                                  |
| 40 | -0.00001016                             | -0.0064                                       |                                                      |                                                    |                                            |                                  |

a) Calculated with cc-pVTZ basis set. b) Dispersion energy of one monomer was calculated and was multiplied by 2 in order to get the dispersion energy of the two monomers. c) Dispersion energy of each monomer in dimer **23** was calculated and total dispersion energy of both monomers was obtained as a sum of the dispersion energy of the monomers. d)  $E_{\text{DISP}}$  of the sum of the monomers. e) Calculated by DLPNO-CCSD(T) LED approach of Neese (Refs. 23-25 in the manuscript).

**Table S7.** Distances between centers of masses of the monomers in the dimers ( $R_{\text{com-com}}$ , in Å) calculated with MBD correction, MBD dispersion interaction energy ( $E_{\text{DISP,MBD}}$ ) in kcal/mol,<sup>a</sup> masses of monomers ( $M_1$ ,  $M_2$ , in amu),<sup>b</sup> sum of mass of monomer ( $M_1+M_2$ , in amu) and  $(M_1+M_2)/R_{\text{com-com}}$  values

|    | $R_{\text{com-com}}$<br>MBD | $E_{\text{DISP,MBD}}$ | $M_1(\text{amu})$ | $M_2(\text{amu})$ | $M_1+M_2$ | $(M_1+M_2)/R_{\text{com-com}}$ |
|----|-----------------------------|-----------------------|-------------------|-------------------|-----------|--------------------------------|
| 1  | 4.6025                      | -1.31                 | 16.04236          |                   | 32.08472  | 6.971150                       |
| 2  | 5.3501                      | -1.37                 | 34.0330           |                   | 68.066    | 12.722379                      |
| 3  | 5.7358                      | -1.39                 | 52.02258          |                   | 104.04516 | 18.1396074                     |
| 4  | 5.5752                      | -1.67                 | 32.1170           |                   | 64.234    | 11.5213804                     |
| 5  | 4.0619                      | -1.46                 | 16.04236          |                   | 32.08472  | 7.89894384                     |
| 6  | 3.6367                      | -1.65                 | 16.04236          |                   | 32.08472  | 8.82248192                     |
| 7  | 5.0789                      | -3.45                 | 30.06904          |                   | 60.13808  | 11.8407687                     |
| 8  | 5.8529                      | -3.73                 | 58.299            |                   | 116.598   | 19.9214065                     |
| 9  | 6.0263                      | -4.21                 | 62.218            |                   | 124.436   | 20.6488227                     |
| 10 | 6.2911                      | -6.24                 | 44.09572          |                   | 88.19144  | 14.0184451                     |
| 11 | 6.7596                      | -6.60                 | 60.1710           |                   | 120.342   | 17.8031245                     |
| 12 | 6.8738                      | -6.72                 | 77.3405           |                   | 154.681   | 22.5029823                     |
| 13 | 5.0887                      | -6.46                 | 44.09572          |                   | 88.19144  | 17.3308389                     |
| 14 | 5.0432                      | -10.30                | 58.12240          |                   | 116.2448  | 23.0498096                     |
| 15 | 6.3857                      | -4.55                 | 52.07536          |                   | 104.15072 | 15.3099926                     |
| 16 | 7.1261                      | -17.21                | 104.15072         |                   | 208.30144 | 29.230777                      |
| 17 | 7.3228                      | -35.04                | 136.238           |                   | 272.4760  | 37.2092642                     |
| 18 | 7.2144                      | -9.37                 | 78.1118           |                   | 156.22360 | 21.654413                      |
| 19 | 6.8083                      | -9.87                 | 78.1118           |                   | 156.22360 | 22.9460511                     |
| 20 | 7.3773                      | -26.17                | 130.901           |                   | 261.802   | 35.4875090                     |
| 21 | 7.7377                      | -34.99                | 156.2237          |                   | 312.4474  | 40.3798803                     |
| 22 | 8.1498                      | -42.65                | 182.2610          |                   | 364.5220  | 44.7277234                     |
| 23 | 8.4719                      | -77.42                | 260.3728          |                   | 520.7456  | 61.4673922                     |
| 24 | 6.5801                      | -7.22                 | 78.11184          | 52.07536          | 130.1872  | 19.7849881                     |
| 25 | 5.5982                      | -3.72                 | 44.09572          | 16.04236          | 60.13808  | 10.7423958                     |
| 26 | 6.1510                      | -11.80                | 44.09572          | 104.15072         | 148.24644 | 24.1011933                     |
| 27 | 7.1169                      | -5.38                 | 77.3405           | 62.218            | 139.5585  | 19.6094507                     |
| 28 | 5.1344                      | -6.78                 | 58.12240          | 30.06904          | 88.19144  | 17.1765815                     |
| 29 | 4.7987                      | -6.71                 | 44.09572          |                   | 88.19144  | 18.3781941                     |
| 30 | 5.4266                      | -6.36                 | 44.09572          |                   | 88.19144  | 16.2516935                     |
| 31 | 4.8789                      | -13.36                | 73.0063           |                   | 146.0126  | 29.9273607                     |
| 32 | 5.6750                      | -13.11                | 73.0063           |                   | 146.0126  | 25.7290925                     |
| 33 | 4.9441                      | -20.22                | 100.20194         |                   | 200.40388 | 40.5339455                     |
| 34 | 5.8017                      | -20.13                | 100.20194         |                   | 200.40388 | 34.5422687                     |
| 35 | 4.0594                      | -11.076               | 78.11184          |                   | 156.22368 | 38.4844263                     |

|    |        |         |          |          |          |            |
|----|--------|---------|----------|----------|----------|------------|
| 36 | 4.0623 | -2.328  | 28.05316 |          | 56.10632 | 13.8114664 |
| 37 | 4.2555 | -6.245  | 78.11184 | 28.05316 | 106.165  | 24.9477147 |
| 38 | 3.0524 | -0.055  | 20.1797  |          | 40.3594  | 13.2221858 |
| 39 | 3.6638 | -0.181  | 39.9480  |          | 79.896   | 21.8068672 |
| 40 | 2.7400 | -0.0064 | 4.00260  |          | 8.0052   | 2.92160584 |

a) Calculated with cc-pVTZ basis set. b) Calculated with the following masses of the corresponding atoms: C=12.0107 amu, H=1.00794 amu, F=18.998 amu, Si=28.085 amu

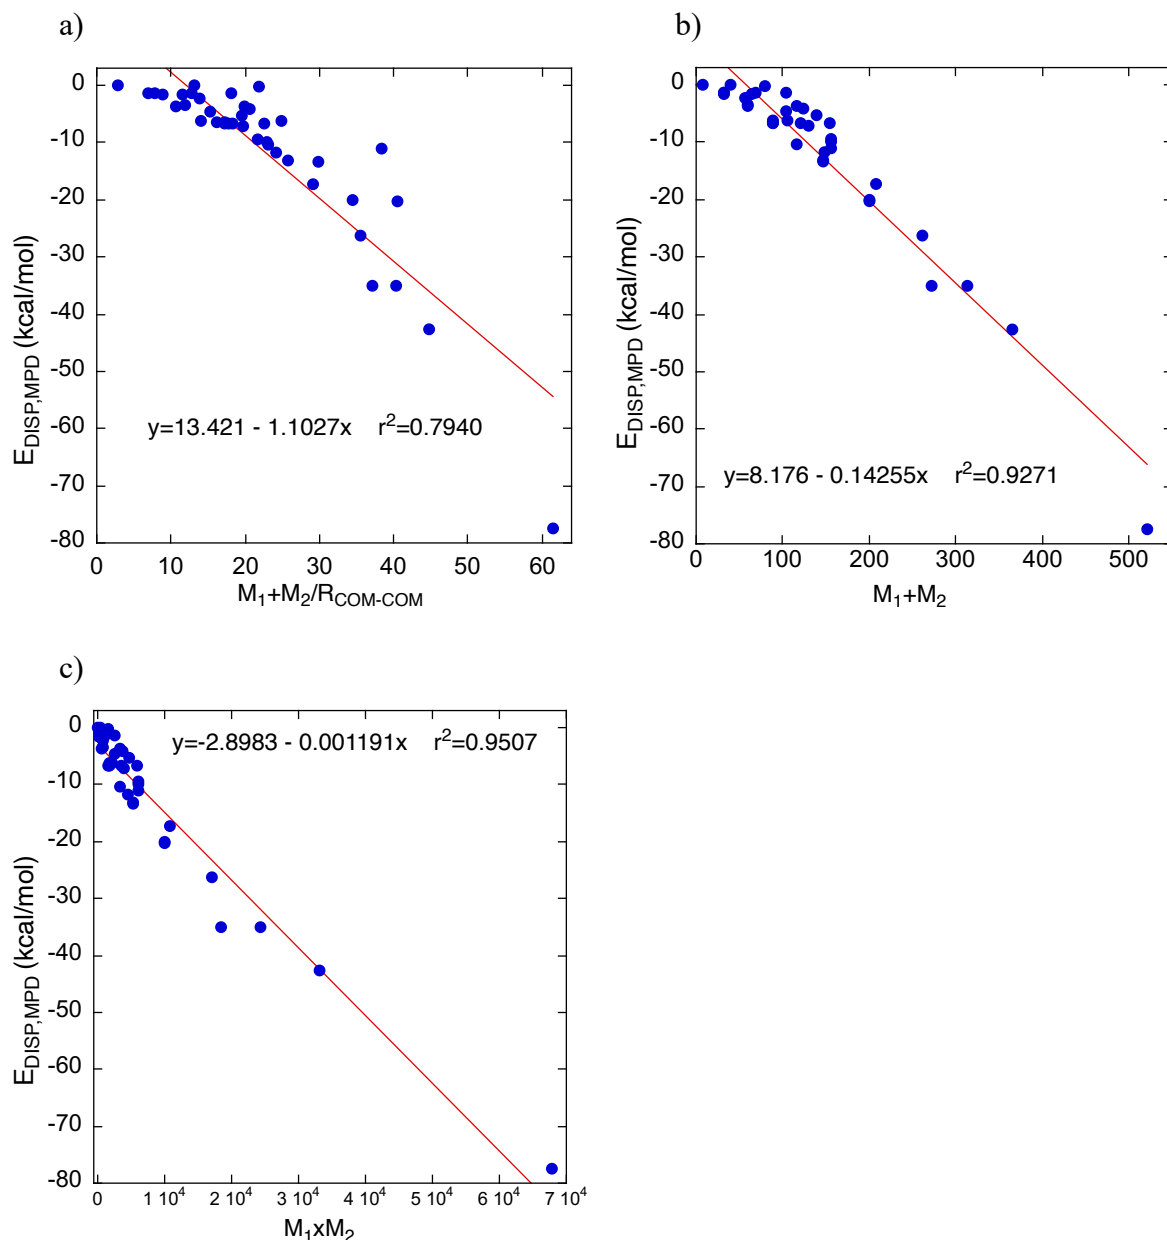

**Figure S6.** A plots of the dispersion interaction energy  $E_{\text{DISP,MPD}}$  (in kcal/mol) calculated with MBD correction vs.:  $M_1+M_2/R_{\text{COM-COM}}$  (a),  $M_1+M_2$  (b), and  $M_1 \times M_2$  (c) for the entire set of the dimers used in this study

## Full citation for Ref. 29

Evgeny Epifanovsky, Andrew T. B. Gilbert, Xintian Feng, Joonho Lee, Yuezhi Mao, Narbe Mardirossian, Pavel Pokhilko, Alec F. White, Marc P. Coons, Adrian L. Dempwolff, Zhengting Gan, Diptarka Hait, Paul R. Horn, Leif D. Jacobson, Ilya Kaliman, Jörg Kussmann, Adrian W. Lange, Ka Un Lao, Daniel S. Levine, Jie Liu, Simon C. McKenzie, Adrian F. Morrison, Kaushik D. Nanda, Felix Plasser, Dirk R. Rehn, Marta L. Vidal, Zhi-Qiang You, Ying Zhu, Bushra Alam, Benjamin J. Albrecht, Abdulrahman Aldossary, Ethan Alguire, Josefine H. Andersen, Vishikh Athavale, Dennis Barton, Khadiza Begam, Andrew Behn, Nicole Bellonzi, Yves A. Bernard, Eric J. Berquist, Hugh G. A. Burton, Abel Carreras, Kevin Carter-Fenk, Romit Chakraborty, Alan D. Chien, Kristina D. Closser, Vale Cofer-Shabica, Saswata Dasgupta, Marc de Wergifosse, Jia Deng, Michael Diedenhofen, Hainam Do, Sebastian Ehlert, Po-Tung Fang, Shervin Fatehi, Qingguo Feng, Triet Friedhoff, James Gayvert, Qinghui Ge, Gergely Gidofalvi, Matthew Goldey, Joe Gomes, Cristina E. González-Espinoza, Sahil Gulania, Anastasia O. Gunina, Magnus W. D. Hanson-Heine, Phillip H. P. Harbach, Andreas Hauser, Michael F. Herbst, Mario Hernández Vera, Manuel Hodecker, Zachary C. Holden, Shannon Houck, Xunkun Huang, Kerwin Hui, Bang C. Huynh, Maxim Ivanov, Ádám Jász, Hyunjun Ji, Hanjie Jiang, Benjamin Kaduk, Sven Kähler, Kirill Khistyayev, Jaehoon Kim, Gergely Kis, Phil Klunzinger, Zsuzsanna Koczor-Benda, Joong Hoon Koh, Dimitri Kosenkov, Laura Koulias, Tim Kowalczyk, Caroline M. Krauter, Karl Kue, Alexander Kunitsa, Thomas Kus, István Ladjánszki, Arie Landau, Keith V. Lawler, Daniel Lefrancois, Susi Lehtola, Run R. Li, Yi-Pei Li, Jiashu Liang, Marcus Liebenthal, Hung-Hsuan Lin, You-Sheng Lin, Fenglai Liu, Kuan-Yu Liu, Matthias Loipersberger, Arne Luenser, Aaditya Manjanath, Prashant Manohar, Erum Mansoor, Sam F. Manzer, Shan-Ping Mao, Aleksandr V. Marenich, Thomas Markovich, Stephen Mason, Simon A. Maurer, Peter F. McLaughlin, Maximilian F. S. J. Menger, Jan-Michael Mewes, Stefanie A. Mewes, Pierpaolo Morgante, J. Wayne Mullinax, Katherine J. Oosterbaan, Garrette Paran, Alexander C. Paul, Suranjan K. Paul, Fabijan Pavošević, Zheng Pei, Stefan Prager, Emil I. Proynov, Ádám Rák, Eloy Ramos-Cordoba, Bhaskar Rana, Alan E. Rask, Adam Rettig, Ryan M. Richard, Fazle Rob, Elliot Rossomme, Tarek Scheele, Maximilian Scheurer, Matthias Schneider, Nickolai Sergueev, Shaama M. Sharada, Wojciech Skomorowski, David W. Small, Christopher J. Stein, Yu-Chuan Su, Eric J. Sundstrom, Zhen Tao, Jonathan Thirman, Gábor J. Tornai, Takashi Tsuchimochi, Norm M. Tubman, Srimukh Prasad Veccham, Oleg Vydrov, Jan Wenzel, Jon Witte, Atsushi Yamada, Kun Yao, Sina Yeganeh, Shane R. Yost, Alexander Zech, Igor Ying Zhang, Xing Zhang, Yu Zhang, Dmitry Zuev, Alán Aspuru-Guzik, Alexis T. Bell, Nicholas A. Besley, Ksenia B. Bravaya, Bernard R. Brooks, David Casanova, Jeng-Da Chai, Sonia Coriani, Christopher J. Cramer, György Cserey, A. Eugene DePrince III, Robert A. DiStasio Jr., Andreas Dreuw, Barry D. Dunietz, Thomas R. Furlani, William A. Goddard III, Sharon Hammes-Schiffer, Teresa Head-Gordon, Warren J. Hehre, Chao-Ping Hsu, Thomas-C. Jagau, Yousung Jung, Andreas Klamt, Jing Kong, Daniel S. Lambrecht, WanZhen Liang, Nicholas J. Mayhall, C. William McCurdy, Jeffrey B. Neaton, Christian Ochsenfeld, John A. Parkhill, Roberto Peverati, Vitaly A. Rassolov, Yihan Shao, Lyudmila V. Slipchenko, Tim Stauch, Ryan P. Steele, Joseph E. Subotnik, Alex J. W. Thom, Alexandre Tkatchenko, Donald G. Truhlar, Troy Van Voorhis, Tomasz A. Wesolowski, K. Birgitta Whaley, H. Lee Woodcock III, Paul M. Zimmerman, Shirin Faraji, Peter M. W. Gill, Martin Head-Gordon, John M. Herbert, and Anna I. Krylov. Software for the frontiers of quantum chemistry: An overview of developments in the Q-Chem 5 package. *J. Chem. Phys.* **2021**, *155*, 084801.



**Table S8.** Bond lengths between the closest H atoms of the dimers ( $R_{H-H}$ , in Å), corresponding MBD and D4 dispersion interaction energies ( $E_{DISP,MBD}$  and  $E_{DISP,D4}$ , in au)<sup>a</sup>

|    | $R_{H-H}$ | $E_{DISP,MBD}$ | $E_{DISP,D4}$ |
|----|-----------|----------------|---------------|
| 1  | 2.425     | -0.00208376    | -0.0017843    |
| 2  | 2.500     | -0.00217864    | -0.0020411    |
| 3  | 2.850     | -0.00221213    | -0.0024345    |
| 4  | 2.600     | -0.002658071   | -0.0030396    |
| 7  | 2.375     | -0.005496169   | -0.0050074    |
| 8  | 2.575     | -0.00592966    | -0.0068       |
| 9  | 2.450     | -0.00670277    | -0.0089262    |
| 10 | 2.330     | -0.00994873    | -0.00930195   |
| 11 | 2.530     | -0.01051204    | -0.01159069   |
| 12 | 2.425     | -0.01071294    | -0.01367970   |
| 13 | 2.225     | -0.0102895     | -0.00964333   |
| 14 | 2.125     | -0.0164187     | -0.01561769   |
| 15 | 2.450     | -0.00726311    | 0.00753346    |
| 16 | 2.275     | -0.0274201     | -0.0292114    |
| 17 | 2.075     | -0.0558462     | -0.0560462    |
| 18 | 2.275     | -0.0149274     | -0.0190080    |
| 19 | 2.325     | -0.0157359     | -0.0168938    |
| 20 | 2.175     | -0.04170417    | -0.0435226    |
| 21 | 2.125     | -0.05575758    | -0.0579044    |
| 22 | 2.10      | -0.067968895   | -0.0708924    |
| 23 | 1.975     | -0.12338109    | -0.1293960    |
| 24 | 2.375     | -0.0115002     | -0.0121986    |
| 25 | 2.450     | -0.00593488    | -0.0054693    |
| 26 | 2.263     | -0.01880351    | -0.0193925    |
| 27 | 2.50      | -0.00856597    | -0.0111620    |
| 28 | 2.250     | -0.01080644    | -0.0101855    |

a) Calculated with cc-pVTZ basis set. b) Calculated with the following masses of the corresponding atoms: C=12.0107 amu, H=1.00794 amu, F=18.998 amu, Si=28.085 amu

**Table S9.** Squared bond lengths between the closest H atoms in the corresponding dimers ( $R_{H-H}^2$ , in Å), squares of distance between the respective centers of masses ( $R_{com-com}^2$ , in Å), the corresponding  $E_{DISP,MBD}$  (kcal/mol) values.<sup>a</sup> Shown also the respective products of the monomer's masses<sup>b</sup> ( $M_1 \times M_2$ , in amu),  $M_1 \times M_2 / R_{H-H}^2$  and  $M_1 \times M_2 / R_{com-com}^2$  values.

|    | $R_{H-H}^2$ | $R_{com-com}^2$ | $E_{DISP,MBD}$<br>(kcal/mol) | $M_1 \times M_2$ (amu) | $M_1 \times M_2 / R_{H-H}^2$ | $M_1 \times M_2 / R_{com-com}^2$ |
|----|-------------|-----------------|------------------------------|------------------------|------------------------------|----------------------------------|
| 1  | 5.8806      | 21.1830         | -1.31                        | 257.35731              | 43.76378                     | 12.149235                        |
| 2  | 6.2500      | 28.6236         | -1.37                        | 1158.2451              | 185.3192                     | 40.46469                         |
| 3  | 8.1225      | 32.8994         | -1.39                        | 2706.34883             | 333.1916                     | 82.2613                          |
| 4  | 6.760       | 31.0829         | -1.67                        | 1031.50169             | 152.5890                     | 33.1855                          |
| 5  |             | 16.4990         | -1.46                        | 257.35731              |                              | 15.59654                         |
| 6  |             | 13.2256         | -1.65                        | 257.35731              |                              | 19.45903                         |
| 7  | 5.6406      | 26.0488         | -3.45                        | 904.14717              | 160.29273                    | 34.709778                        |
| 8  | 6.6306      | 34.2564         | -3.73                        | 3398.77340             | 512.58912                    | 99.21485                         |
| 9  | 6.0025      | 36.3163         | -4.21                        | 3871.07952             | 644.91121                    | 106.59344                        |
| 10 | 5.4056      | 39.5779         | -6.24                        | 1944.43252             | 359.7071                     | 49.12925                         |

|    |        |         |        |             |            |            |
|----|--------|---------|--------|-------------|------------|------------|
| 11 | 6.4009 | 45.6922 | -6.60  | 3620.54924  | 565.63128  | 79.23780   |
| 12 | 5.8806 | 47.2491 | -6.72  | 5981.55294  | 1017.16712 | 126.59612  |
| 13 | 4.9506 | 25.8949 | -6.46  | 1944.43252  | 392.7670   | 75.08940   |
| 14 | 4.5156 | 25.4339 | -10.30 | 3378.21338  | 748.1206   | 122.82326  |
| 15 | 6.0025 | 40.7772 | -4.55  | 2711.84312  | 451.7856   | 66.50391   |
| 16 | 5.1756 | 50.7813 | -17.21 | 10847.3724  | 2095.8676  | 213.60959  |
| 17 | 4.3056 | 53.6234 | -35.04 | 18560.79264 | 4310.8493  | 346.13233  |
| 18 | 5.1756 | 52.0476 | -9.37  | 6101.45330  | 1178.8881  | 117.22833  |
| 19 | 5.4056 | 46.3529 | -9.87  | 6101.45330  | 1128.7282  | 131.63045  |
| 20 | 4.7306 | 54.4246 | -26.17 | 17135.0718  | 3622.1773  | 314.84056  |
| 21 | 4.5156 | 59.8720 | -34.99 | 24405.84444 | 5404.78440 | 407.63369  |
| 22 | 4.4100 | 66.4192 | -42.65 | 33219.07212 | 7532.66942 | 500.14261  |
| 23 | 3.9006 | 71.7731 | -77.42 | 67793.99498 | 17380.4017 | 944.560076 |
| 24 | 5.6406 | 43.2977 | -7.22  | 4067.702188 | 721.147074 | 93.94730   |
| 25 | 6.0025 | 31.3398 | -3.72  | 707.3994147 | 117.850798 | 22.571919  |
| 26 | 5.1212 | 37.8348 | -11.80 | 4592.600987 | 896.782187 | 121.385629 |
| 27 | 6.250  | 50.6503 | -5.38  | 4811.971229 | 769.915397 | 95.003805  |
| 28 | 5.0625 | 26.3621 | -6.78  | 1747.684771 | 345.221683 | 66.2953547 |
| 29 |        | 23.0275 | -6.71  | 1944.423703 |            | 84.4391216 |
| 30 |        | 29.4480 | -6.36  | 1944.423703 |            | 66.029086  |
| 31 |        | 23.8037 | -13.36 | 5329.91984  |            | 223.911729 |
| 32 |        | 32.2056 | -13.11 | 5329.91984  |            | 165.49655  |
| 33 |        | 24.4441 | -20.22 | 10040.42878 |            | 410.750185 |
| 34 |        | 33.6597 | -20.13 | 10040.42878 |            | 298.292081 |
| 35 |        | 16.4787 | -11.08 | 6101.459548 |            | 370.262766 |
| 36 |        | 16.5023 | -2.33  | 786.979786  |            | 47.6891511 |
| 37 |        | 18.1093 | -6.25  | 2191.283945 |            | 121.00337  |
| 38 |        | 9.31715 | -0.06  | 407.2202921 |            | 43.7065495 |
| 39 |        | 13.4234 | -0.18  | 1595.842704 |            | 118.884864 |
| 40 |        | 7.5076  | -0.006 | 16.02080678 |            | 2.13394517 |

a) Calculated with cc-pVTZ basis set. b) Calculated with the following masses of the corresponding atoms: C=12.0107 amu, H=1.00794 amu, F=18.998 amu, Si=28.085 amu

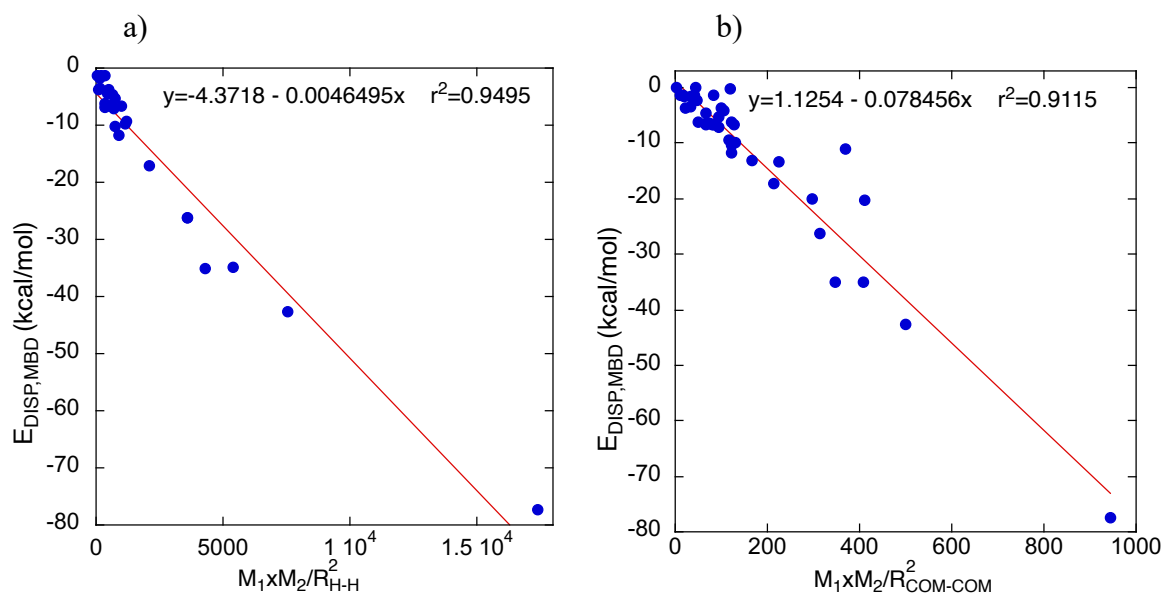

**Figure S7.** Dependence of the dispersion interaction energy ( $E_{\text{DISP,MBD}}$  (kcal/mol)) on  $M_1 \times M_2 / R_{\text{H-H}}^2$  (a) for 26 dimers and on  $M_1 \times M_2 / R_{\text{COM-COM}}^2$  (b) for 40 dimers.  $M$  (in amu) and  $R$  (in Å).

**Table S10.** Bond lengths between closest H atoms of the dimers ( $R_{\text{H-H}}$ , in Å), MBD dispersion interaction energies of dimers ( $E_{\text{DISP,MBD}}$ , in kcal/mol), products of masses of monomers ( $M_1 \times M_2$ , in amu), and  $M_1 \times M_2 / R_{\text{H-H}}$  values.

|    | $R_{\text{H-H}}$ | $E_{\text{DISP,MBD}}$<br>(kcal/mol) | $M_1 \times M_2$ (amu) | $M_1 \times M_2 / R_{\text{H-H}}$ |
|----|------------------|-------------------------------------|------------------------|-----------------------------------|
| 1  | 2.425            | -1.31                               | 257.35731              | 113.5494                          |
| 2  | 2.500            | -1.37                               | 1158.2451              | 463.29804                         |
| 3  | 2.850            | -1.39                               | 2706.34883             | 949.59608                         |
| 4  | 2.600            | -1.67                               | 1031.50169             | 396.73142                         |
| 7  | 2.375            | -3.45                               | 904.14717              | 380.69355                         |
| 8  | 2.575            | -3.73                               | 3398.77340             | 1319.9120                         |
| 9  | 2.450            | -4.21                               | 3871.07952             | 1580.0325                         |
| 10 | 2.330            | -6.24                               | 1944.43252             | 835.5204                          |
| 11 | 2.530            | -6.60                               | 3620.54924             | 1431.0471                         |
| 12 | 2.425            | -6.72                               | 5981.55294             | 2466.6198                         |
| 13 | 2.225            | -6.46                               | 1944.43252             | 783.9023                          |
| 14 | 2.125            | -10.30                              | 3378.21338             | 1589.7475                         |
| 15 | 2.450            | -4.55                               | 2711.84312             | 1106.8747                         |
| 16 | 2.275            | -17.21                              | 10847.3724             | 4768.0758                         |
| 17 | 2.075            | -35.04                              | 18560.79264            | 8944.9603                         |
| 18 | 2.275            | -9.37                               | 6101.45330             | 2681.9575                         |
| 19 | 2.325            | -9.87                               | 6101.45330             | 2624.2810                         |
| 20 | 2.175            | -26.17                              | 17135.0718             | 7878.1939                         |
| 21 | 2.125            | -34.99                              | 24405.84444            | 11485.1033                        |
| 22 | 2.10             | -42.65                              | 33219.07212            | 15818.6078                        |
| 23 | 1.975            | -77.42                              | 67793.99498            | 34326.0734                        |
| 24 | 2.375            | -7.22                               | 4067.702188            | 1712.71671                        |
| 25 | 2.450            | -3.72                               | 707.3994147            | 288.73446                         |

|    |       |        |             |            |
|----|-------|--------|-------------|------------|
| 26 | 2.263 | -11.80 | 4592.600987 | 2029.43040 |
| 27 | 2.50  | -5.38  | 4811.971229 | 1924.78849 |
| 28 | 2.250 | -6.78  | 1747.684771 | 776.748787 |

C=12.0107 amu, H=1.00794 amu, F=18.998 amu, Si=28.085 amu

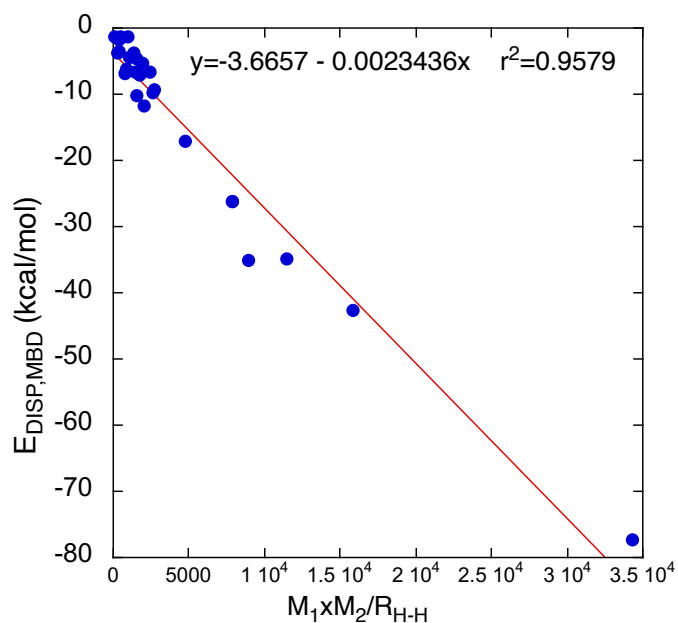

**Figure S8.** Dependence of MBD dispersion interaction energy ( $E_{\text{DISP}}$  (kcal/mol)) for 26 dimers, on  $M_1 \times M_2 / R_{\text{H-H}}$  ( $M$  in amu and  $R_{\text{H-H}}$  in Å).

### Cartesian Coordinates of investigated dimers in Å optimized by PBE0-MBD/cc-pVTZ

|                                                 | X           | Y           | Z           |
|-------------------------------------------------|-------------|-------------|-------------|
| <b>Dimer 1: H<sub>3</sub>CH—HCH<sub>3</sub></b> |             |             |             |
| C                                               | -0.00002328 | -0.00001050 | 2.29962938  |
| H                                               | 0.00004709  | 0.00009262  | 1.21074120  |
| H                                               | -0.44879776 | 0.92380972  | 2.66167945  |
| H                                               | -0.57566855 | -0.85064087 | 2.66153549  |
| H                                               | 1.02444564  | -0.07325096 | 2.66160300  |
| H                                               | -0.00004833 | 0.00009262  | -1.21438946 |
| C                                               | 0.00002204  | -0.00001049 | -2.30327765 |
| H                                               | 0.57566731  | -0.85064087 | -2.66518376 |
| H                                               | -1.02444688 | -0.07325095 | -2.66525127 |
| H                                               | 0.44879652  | 0.92380973  | -2.66532771 |

### Dimer 2: H<sub>2</sub>FCH—HCFH<sub>2</sub>

|   |               |               |              |
|---|---------------|---------------|--------------|
| C | -0.0064833782 | 0.0004280546  | 2.3825481057 |
| H | -0.0028495232 | 0.0001943428  | 1.2903348389 |
| H | -0.4526951536 | 0.9278654166  | 2.7470696809 |
| H | -0.5800926742 | -0.8541083059 | 2.7468470985 |

|   |               |               |               |
|---|---------------|---------------|---------------|
| F | 1.2861503661  | -0.0919328182 | 2.8382998089  |
| H | 0.0026626832  | 0.0001943428  | -1.2096585590 |
| C | 0.0062965382  | 0.0004280646  | -2.3018718355 |
| H | 0.5799058342  | -0.8541082959 | -2.6661708185 |
| H | 0.4525083136  | 0.9278654266  | -2.6663934009 |
| F | -1.2863372061 | -0.0919328082 | -2.7576235389 |

**Dimer 3:** HF<sub>2</sub>CH—HCF<sub>2</sub>H

|   |               |               |               |
|---|---------------|---------------|---------------|
| C | -0.0013978207 | 0.0047607409  | 2.7368992072  |
| H | 0.0107662146  | -0.0212453544 | 1.6437564003  |
| H | -0.4464506530 | 0.9222759180  | 3.1300146818  |
| F | 1.2670226819  | -0.0957162406 | 3.1871654994  |
| F | -0.7072707997 | -1.0532899475 | 3.1879435224  |
| H | -0.0104231088 | 0.0149023035  | -1.2058642463 |
| C | 0.0056366944  | -0.0093114802 | -2.2989848953 |
| H | 0.5772991042  | -0.8538258262 | -2.6918572918 |
| F | -1.2638710306 | -0.0913303781 | -2.7497339127 |
| F | 0.5532938478  | 1.1389474746  | -2.7500296550 |

**Dimer 4:** H<sub>3</sub>SiH—HSiH<sub>3</sub>

|    |               |               |               |
|----|---------------|---------------|---------------|
| Si | 0.0000720282  | 0.0001118256  | 3.2722750414  |
| H  | 0.0001559846  | 0.0001392535  | 1.7847462961  |
| H  | -0.6130750309 | 1.2620649212  | 3.7672411842  |
| H  | -0.7863461610 | -1.1620321858 | 3.7670185323  |
| H  | 1.3996784935  | -0.1002678444 | 3.7671925426  |
| H  | -0.0000687746 | 0.0001392535  | -0.8155949678 |
| H  | 0.7864333524  | -1.1620321770 | -2.7978672130 |
| H  | -1.3995912836 | -0.1002678343 | -2.7980412225 |
| H  | 0.6131622312  | 1.2620649408  | -2.7980898542 |
| Si | 0.0000151803  | 0.0001118370  | -2.3031237189 |

**Dimer 5:** H<sub>2</sub>CH<sub>2</sub>—H<sub>2</sub>CH<sub>2</sub>

|   |               |               |               |
|---|---------------|---------------|---------------|
| C | -0.0000000000 | 2.0310878233  | 0.0000018800  |
| H | 0.0000000000  | 1.4014598716  | 0.8887371115  |
| H | -0.0000000000 | 1.4014496727  | -0.8887188101 |
| H | 0.8894424744  | 2.6597618570  | -0.0000370907 |
| H | -0.8894424744 | 2.6597618570  | -0.0000370907 |
| C | -0.0000000000 | -2.0310878233 | 0.0000018800  |
| H | 0.0000000000  | -1.4014496727 | -0.8887188101 |
| H | 0.0000000000  | -1.4014598716 | 0.8887371115  |
| H | -0.8894424744 | -2.6597618570 | -0.0000370907 |
| H | 0.8894424744  | -2.6597618570 | -0.0000370907 |

**Dimer 6:** HCH<sub>3</sub>—H<sub>3</sub>CH

|   |               |              |              |
|---|---------------|--------------|--------------|
| C | -0.0067554976 | 1.8190587381 | 0.0116687848 |
| H | -0.0067311567 | 2.9078354823 | 0.0116712601 |
| H | 1.0194019665  | 1.4545440872 | 0.0116681266 |
| H | -0.5198038312 | 1.4545358649 | 0.9003310037 |

|   |               |               |               |
|---|---------------|---------------|---------------|
| H | -0.5198009982 | 1.4545357859  | -0.8769885942 |
| C | 0.0067554957  | -1.8181639614 | -0.0116687871 |
| H | 0.0067311567  | -2.9069405079 | -0.0116712601 |
| H | -1.0194020604 | -1.4536500046 | -0.0116681266 |
| H | 0.5198010417  | -1.4536417023 | 0.8769886692  |
| H | 0.5198038735  | -1.4536417822 | -0.9003310864 |

**Dimer 7:** H<sub>3</sub>CH<sub>2</sub>CH—HCH<sub>2</sub>CH<sub>3</sub>

|   |             |             |             |
|---|-------------|-------------|-------------|
| C | 0.00214882  | 0.00000000  | -0.00224742 |
| H | -0.00466804 | 0.00000000  | 1.08975279  |
| C | 1.42012592  | 0.00000000  | -0.54734243 |
| H | -0.55323542 | -0.88051111 | -0.33175574 |
| H | -0.55323542 | 0.88051111  | -0.33175574 |
| H | 1.42751418  | 0.00000000  | -1.63949900 |
| H | 1.97480398  | 0.88028972  | -0.21577444 |
| H | 1.97480398  | -0.88028972 | -0.21577444 |
| H | -0.00466804 | 0.00000000  | 3.43985059  |
| C | 0.00214882  | 0.00000000  | 4.53185080  |
| C | 1.42012592  | 0.00000000  | 5.07694581  |
| H | -0.55323542 | -0.88051111 | 4.86135912  |
| H | -0.55323542 | 0.88051111  | 4.86135912  |
| H | 1.42751418  | 0.00000000  | 6.16910238  |
| H | 1.97480398  | -0.88028972 | 4.74537782  |
| H | 1.97480398  | 0.88028972  | 4.74537782  |

**Dimer 8:** H<sub>3</sub>CH<sub>2</sub>SiH—HSiH<sub>2</sub>CH<sub>3</sub>

|    |               |               |               |
|----|---------------|---------------|---------------|
| Si | -0.1010958100 | 0.0000000000  | -0.3850109700 |
| H  | -0.2411142100 | -0.0000000000 | 1.0978039001  |
| C  | 1.7112119400  | 0.0000000000  | -0.8724718600 |
| H  | -0.7942154600 | -1.2085756800 | -0.9158247300 |
| H  | -0.7942154600 | 1.2085756800  | -0.9158247300 |
| H  | 1.8243794100  | -0.0000000000 | -1.9579014200 |
| H  | 2.2164259900  | 0.8836743700  | -0.4782551000 |
| H  | 2.2164259900  | -0.8836743700 | -0.4782551000 |
| H  | -0.2411142100 | 0.0000000000  | 3.6728038999  |
| C  | 1.7112119500  | -0.0000000000 | 5.6430796700  |
| H  | -0.7942154600 | -1.2085756900 | 5.6864325300  |
| H  | -0.7942154600 | 1.2085756900  | 5.6864325300  |
| H  | 1.8243794100  | 0.0000000000  | 6.7285092300  |
| H  | 2.2164259900  | -0.8836743700 | 5.2488629200  |
| H  | 2.2164259900  | 0.8836743700  | 5.2488629200  |
| Si | -0.1010958000 | -0.0000000000 | 5.1556187900  |

**Dimer 9:** H<sub>3</sub>SiH<sub>2</sub>SiH—HSiH<sub>2</sub>SiH<sub>3</sub>

|    |               |               |               |
|----|---------------|---------------|---------------|
| Si | -0.0985782884 | -0.0000000000 | -0.3850552762 |
| H  | -0.2324978226 | -0.0000000000 | 1.0992089122  |
| H  | -0.7851083206 | -1.2103069019 | -0.9191453956 |
| H  | -0.7851083206 | 1.2103069019  | -0.9191453956 |
| Si | 2.1668504884  | -0.0000000000 | -0.9931796202 |
| H  | 2.3120735491  | -0.0000000000 | -2.4765197504 |

|    |               |               |               |
|----|---------------|---------------|---------------|
| H  | 2.8500298123  | 1.2098479018  | -0.4534419386 |
| H  | 2.8500298123  | -1.2098479018 | -0.4534419386 |
| H  | -0.2324978126 | 0.0000000000  | 3.5492089278  |
| Si | -0.0985782684 | 0.0000000000  | 5.0334731262  |
| Si | 2.1668504884  | 0.0000000000  | 5.6415974802  |
| H  | -0.7851083206 | -1.2103069119 | 5.5675632556  |
| H  | -0.7851083206 | 1.2103069119  | 5.5675632556  |
| H  | 2.3120735591  | 0.0000000000  | 7.1249376104  |
| H  | 2.8500298223  | -1.2098479018 | 5.1018597986  |
| H  | 2.8500298223  | 1.2098479018  | 5.1018597986  |

**Dimer 10:** C<sub>2</sub>H<sub>5</sub>H<sub>2</sub>CH—HCH<sub>2</sub>C<sub>2</sub>H<sub>5</sub>

|   |             |             |             |
|---|-------------|-------------|-------------|
| C | 0.00223849  | -0.00000004 | 0.07990961  |
| H | -0.00158362 | -0.00000006 | 1.17161102  |
| C | 1.41438867  | 0.00000019  | -0.48207322 |
| H | -0.55149327 | -0.88112347 | -0.25492001 |
| H | -0.55149337 | 0.88112333  | -0.25492002 |
| H | 1.95687221  | -0.87438829 | -0.10928119 |
| H | 1.95687156  | 0.87438930  | -0.10928174 |
| C | 1.42801063  | -0.00000008 | -2.00148519 |
| H | 0.91383256  | 0.88093120  | -2.39491708 |
| H | 0.91383259  | -0.88093140 | -2.39491702 |
| H | 2.44432752  | -0.00000005 | -2.40014561 |
| H | -0.00158367 | -0.00000106 | 3.50161104  |
| C | 0.00223838  | -0.00000050 | 4.59331245  |
| C | 1.41438854  | 0.00013863  | 5.15529527  |
| H | -0.55158039 | 0.88106889  | 4.92814104  |
| H | -0.55140644 | -0.88117793 | 4.92814306  |
| H | 1.95678569  | 0.87458042  | 4.78250289  |
| H | 1.95695771  | -0.87419718 | 4.78250402  |
| C | 1.42801059  | 0.00013969  | 6.67470723  |
| H | 0.91391891  | -0.88084195 | 7.06813939  |
| H | 0.91374620  | 0.88102064  | 7.06813886  |
| H | 2.44432750  | 0.00023929  | 7.07336759  |

**Dimer 11:** C<sub>2</sub>H<sub>5</sub>H<sub>2</sub>SiH—HSiH<sub>2</sub>C<sub>2</sub>H<sub>5</sub>

|    |               |               |               |
|----|---------------|---------------|---------------|
| Si | -0.1005063408 | 0.0000000125  | -0.3657123425 |
| H  | -0.2486606207 | 0.0000000118  | 1.1171749902  |
| C  | 1.7095072207  | -0.0000000340 | -0.8857786218 |
| H  | -0.7882293453 | -1.2069636920 | -0.9113439784 |
| H  | -0.7882293515 | 1.2069637102  | -0.9113439830 |
| H  | 2.1970643357  | 0.8746627344  | -0.4442021341 |
| H  | 2.1970642093  | -0.8746629008 | -0.4442021938 |
| C  | 1.8775556631  | 0.0000000198  | -2.4025190994 |
| H  | 1.4111488562  | 0.8795426842  | -2.8524546635 |
| H  | 2.9301480907  | -0.0000006274 | -2.6945909523 |
| H  | 1.4111477220  | -0.8795419484 | -2.8524548791 |
| H  | -0.2486606140 | 0.0000000117  | 3.6534328148  |
| C  | 1.7095072219  | -0.0000000341 | 5.6563864343  |
| H  | -0.7882293433 | -1.2069636922 | 5.6819517824  |
| H  | -0.7882293491 | 1.2069637096  | 5.6819517869  |
| H  | 2.1970642137  | -0.8746628999 | 5.2148100063  |

|    |               |               |              |
|----|---------------|---------------|--------------|
| H  | 2.1970643387  | 0.8746627361  | 5.2148099487 |
| Si | -0.1005063377 | 0.0000000129  | 5.1363201498 |
| C  | 1.8775556575  | 0.0000000131  | 7.1731269111 |
| H  | 2.9301480860  | -0.0000006214 | 7.4651987694 |
| H  | 1.4111488417  | 0.8795426784  | 7.6230624774 |
| H  | 1.4111477241  | -0.8795419540 | 7.6230626864 |

**Dimer 12:** (H<sub>3</sub>CSiH<sub>2</sub>)H<sub>2</sub>SiH—HSiH<sub>2</sub>(SiH<sub>2</sub>CH<sub>3</sub>)

|    |               |               |               |
|----|---------------|---------------|---------------|
| Si | -0.0987678764 | 0.0000000203  | -0.3114442820 |
| H  | -0.2402185968 | 0.0000000104  | 1.1725223719  |
| H  | -0.7944377060 | -1.2077142583 | -0.8445536237 |
| H  | -0.7944377057 | 1.2077142984  | -0.8445536230 |
| Si | 2.1600444331  | -0.0000000491 | -0.9475293444 |
| H  | 2.8211637522  | 1.2030639819  | -0.3576795021 |
| H  | 2.8211635719  | -1.2030642234 | -0.3576795922 |
| C  | 2.3592051882  | 0.0000000200  | -2.8210994994 |
| H  | 1.8921622695  | 0.8834227915  | -3.2599668958 |
| H  | 3.4151114277  | -0.0000005988 | -3.0982056930 |
| H  | 1.8921611822  | -0.8834220727 | -3.2599671056 |
| H  | -0.2402185869 | 0.0000000101  | 3.5980854280  |
| H  | -0.7944376966 | -1.2077142586 | 5.6151614332  |
| H  | -0.7944377058 | 1.2077142983  | 5.6151614228  |
| H  | 2.8211635719  | -1.2030642234 | 5.1282874021  |
| H  | 2.8211637522  | 1.2030639819  | 5.1282873114  |
| Si | -0.0987678751 | 0.0000000206  | 5.0820520837  |
| C  | 2.3592051712  | 0.0000000109  | 7.5917073096  |
| H  | 3.4151114294  | -0.0000005878 | 7.8688135174  |
| H  | 1.8921622524  | 0.8834227801  | 8.0305747040  |
| H  | 1.8921611930  | -0.8834220739 | 8.0305749053  |
| Si | 2.1600444343  | -0.0000000483 | 5.7181371519  |

**Dimer 13:** (CH<sub>3</sub>)<sub>2</sub>HCH—HCH(CH<sub>3</sub>)<sub>2</sub>

|   |             |             |             |
|---|-------------|-------------|-------------|
| C | -0.00130921 | 0.00829586  | 0.06878500  |
| H | 0.01781991  | -0.02488842 | 1.16258167  |
| C | 1.42054500  | -0.00720493 | -0.46623394 |
| H | -0.52533523 | -0.89800841 | -0.24997121 |
| H | 1.42600366  | -0.00356350 | -1.55954882 |
| H | 1.97296456  | 0.87618300  | -0.13476537 |
| H | 1.97258547  | -0.88852289 | -0.13349594 |
| C | -0.77920788 | 1.23154588  | -0.38527400 |
| H | -0.84161167 | 1.27267983  | -1.47589903 |
| H | -1.79805269 | 1.23223575  | 0.00732171  |
| H | -0.29169578 | 2.15093822  | -0.05031088 |
| H | 0.01781991  | -0.02488842 | 3.38846564  |
| C | -0.00130921 | 0.00829586  | 4.48226227  |
| C | 1.42054501  | -0.00720493 | 5.01728124  |
| H | -0.52533523 | -0.89800841 | 4.80101852  |
| H | 1.42600366  | -0.00356350 | 6.11059611  |
| H | 1.97258547  | -0.88852289 | 4.68454323  |



|   |             |            |            |
|---|-------------|------------|------------|
| H | 1.97296456  | 0.87618300 | 4.68581266 |
| C | -0.77920788 | 1.23154589 | 4.93632131 |
| H | -1.79805269 | 1.23223575 | 4.54372557 |
| H | -0.84161167 | 1.27267982 | 6.02694631 |
| H | -0.29169578 | 2.15093822 | 4.60135817 |

**Dimer 14:**  $(\text{CH}_3)_3\text{CH—HC}(\text{CH}_3)_3$

|   |             |             |             |
|---|-------------|-------------|-------------|
| C | -0.01867003 | -0.00026251 | 0.00660356  |
| H | 0.02542256  | -0.00099163 | 1.10205595  |
| C | 1.40986154  | 0.00025070  | -0.51775215 |
| H | 1.95896592  | 0.88367179  | -0.18271678 |
| H | 1.95966049  | -0.88245404 | -0.18198103 |
| C | -0.76614511 | 1.25072724  | -0.43186753 |
| H | 1.41881553  | -0.00015332 | -1.61215676 |
| H | -0.83291619 | 1.29295460  | -1.52333352 |
| H | -1.78530201 | 1.26262972  | -0.03794077 |
| H | -0.26394951 | 2.16003879  | -0.09389782 |
| C | -0.76608832 | -1.25083971 | -0.43313634 |
| H | -0.25281504 | -2.16067104 | -0.11371236 |
| H | -1.77827828 | -1.27330395 | -0.02199639 |
| H | -0.85140731 | -1.28159662 | -1.52367120 |
| H | 0.02542256  | -0.00099163 | 3.22706809  |
| C | -0.01867004 | -0.00026251 | 4.32252049  |
| C | 1.40986154  | 0.00025070  | 4.84687620  |
| H | 1.41881553  | -0.00015332 | 5.94128081  |
| H | 1.95966049  | -0.88245404 | 4.51110508  |
| H | 1.95896592  | 0.88367179  | 4.51184084  |
| C | -0.76614512 | 1.25072724  | 4.76099158  |
| H | -1.78530202 | 1.26262972  | 4.36706483  |
| H | -0.83291619 | 1.29295460  | 5.85245757  |
| H | -0.26394951 | 2.16003879  | 4.42302186  |
| C | -0.76608833 | -1.25083971 | 4.76226038  |
| H | -1.77827828 | -1.27330395 | 4.35112044  |
| H | -0.25281504 | -2.16067105 | 4.44283642  |
| H | -0.85140731 | -1.28159662 | 5.85279525  |

**Dimer 15:**  $\text{H}_3\text{C}_4\text{H—HC}_4\text{H}_3$

|   |               |               |               |
|---|---------------|---------------|---------------|
| C | -0.0001687437 | -0.0000420774 | 0.3614840648  |
| C | -0.8121542346 | -0.2455295356 | -0.8377639905 |
| C | 0.1935361579  | 0.8263002974  | -0.8374772692 |
| C | 0.6187193391  | -0.5806060723 | -0.8375169626 |
| H | -0.0000279918 | -0.0000907350 | 1.4299437628  |
| H | -1.7773919736 | -0.5377258467 | -1.1932536006 |
| H | 0.4228979272  | 1.8082958658  | -1.1930569814 |
| H | 1.3544594196  | -1.2702281584 | -1.1932987107 |
| C | -0.0001783350 | -0.0000353000 | 4.9484985106  |
| C | -0.8121120231 | -0.2455622293 | 6.1478344539  |
| C | 0.1935314708  | 0.8262186893  | 6.1475830681  |
| C | 0.6186901035  | -0.5806212054 | 6.1475563725  |
| H | -0.0000324003 | -0.0000809641 | 3.8800014420  |
| H | -1.7769127997 | -0.5376922744 | 6.5044606346  |
| H | 0.4228204561  | 1.8077584147  | 6.5043676979  |

H 1.3541035677 -1.2699780186 6.5044196277

**Dimer 16:** H<sub>7</sub>C<sub>8</sub>H—HC<sub>8</sub>H<sub>7</sub> (cubane)

|   |             |             |             |
|---|-------------|-------------|-------------|
| C | -2.37438447 | -0.01391040 | 0.09884370  |
| H | -1.28799640 | -0.03512861 | 0.15212364  |
| C | -4.14778752 | -0.93512832 | -0.83041188 |
| C | -4.12750489 | 1.22660964  | -0.39560995 |
| C | -3.20643343 | 0.25290551  | -1.19176459 |
| C | -4.23643748 | -0.22901780 | 1.25693113  |
| C | -3.31541388 | -1.20282062 | 0.46084844  |
| C | -3.29511100 | 0.95905424  | 0.89568028  |
| C | -5.06903241 | 0.03775498  | -0.03358762 |
| H | -4.49182155 | -1.69883200 | -1.52468842 |
| H | -4.45488733 | 2.20468479  | -0.74189213 |
| H | -2.79034514 | 0.44620851  | -2.17829474 |
| H | -4.65224637 | -0.42236391 | 2.24356374  |
| H | -2.98771769 | -2.18079631 | 0.80710684  |
| H | -2.95068094 | 1.72266937  | 1.58984614  |
| H | -6.15558078 | 0.05880427  | -0.08645048 |
| C | 2.05734830  | 0.00538088  | -0.06151765 |
| H | 0.97096030  | 0.02659937  | -0.11479860 |
| C | 2.97807526  | -0.96758450 | -0.85835285 |
| C | 2.99837839  | 1.19429062  | -0.42352221 |
| C | 3.91940243  | 0.22048707  | -1.21960352 |
| C | 2.88939603  | -0.26143458 | 1.22909153  |
| C | 3.81046792  | -1.23513946 | 0.43293829  |
| C | 3.83075080  | 0.92659878  | 0.86773902  |
| C | 4.75199612  | -0.04628527 | 0.07091613  |
| H | 2.63364560  | -1.73119990 | -1.55251858 |
| H | 2.67068285  | 2.17226622  | -0.76978149 |
| H | 4.33521233  | 0.41383252  | -2.20623583 |
| H | 2.47330675  | -0.45473693 | 2.21562140  |
| H | 4.13784970  | -2.21321450 | 0.77922136  |
| H | 4.17478444  | 1.69030273  | 1.56201542  |
| H | 5.83854442  | -0.06733485 | 0.12378001  |

**Dimer 17:** H<sub>15</sub>C<sub>10</sub>H—HC<sub>10</sub>H<sub>15</sub> (adamantane)

|   |               |               |               |
|---|---------------|---------------|---------------|
| C | -1.2512580945 | 0.0014447688  | -4.5331335448 |
| C | -0.0001235489 | 1.2445251646  | -2.7612423124 |
| C | 1.2481335316  | -0.0013367292 | -4.5311413071 |
| C | -0.0029283957 | -1.2565268787 | -2.7691903511 |
| C | -1.2503012639 | -1.2486921591 | -3.6528854863 |
| C | -0.0006594466 | 0.0020950040  | -5.4138613643 |
| C | -1.2467375929 | 1.2467239390  | -3.6461299866 |
| C | 1.2473963684  | 1.2436834160  | -3.6447126890 |
| C | 1.2453783869  | -1.2511955542 | -3.6514603233 |
| C | -0.0026505360 | -0.0089965776 | -1.8844115499 |
| H | -2.1450794262 | 0.0043889516  | -5.1648857415 |
| H | 0.0009877220  | 2.1356012499  | -2.1257000212 |
| H | 2.1418366957  | -0.0004543894 | -5.1618030462 |
| H | -0.0038482437 | -2.1525328115 | -2.1403679585 |
| H | 2.1455059233  | -1.2737565650 | -3.0272449767 |

|   |               |               |                |
|---|---------------|---------------|----------------|
| H | 1.2692678550  | -2.1503564250 | -4.2769208835  |
| H | -0.0009339824 | -0.8777868157 | -6.0657312229  |
| H | -1.2754300701 | -2.1478464803 | -4.2782930880  |
| H | -2.1504389072 | -1.2698005946 | -3.0287598493  |
| H | -0.8848964964 | -0.0102264960 | -1.2357477040  |
| H | 0.0010895729  | 0.8848621166  | -6.0618708738  |
| H | 0.8778642353  | -0.0123636823 | -1.2336945592  |
| H | -2.1479497683 | 1.2694405004  | -3.0236737797  |
| H | 1.2698733945  | 2.1461993692  | -4.2654872765  |
| H | -1.2663652760 | 2.1493731136  | -4.2667886778  |
| H | 2.1487325387  | 1.2637698441  | -3.0222209102  |
| H | 3.8360448211  | 0.0002950370  | -6.3613914539  |
| C | 4.7298358432  | 0.0010844825  | -6.9919263799  |
| C | 4.7303085767  | 1.2481697816  | -7.8756345239  |
| C | 4.7330471126  | -1.2464687062 | -7.8748194344  |
| C | 5.9783164308  | 0.0029481456  | -6.1088865644  |
| C | 5.9773801566  | 1.2523639250  | -8.7598945071  |
| H | 4.7076765449  | 2.1490254113  | -7.2526031839  |
| H | 3.8288296955  | 1.2686817563  | -8.4978754295  |
| C | 5.9807806158  | -1.2475248312 | -8.7579867258  |
| H | 3.8320676507  | -1.2689344965 | -8.4978189406  |
| H | 4.7112191662  | -2.1476227034 | -7.2521085138  |
| C | 7.2287109083  | 0.0062218143  | -6.9896685254  |
| H | 5.9796434423  | -0.8795548254 | -5.4604383280  |
| H | 5.9753753912  | 0.8830178962  | -5.4572372534  |
| C | 7.2245631611  | 1.2521204877  | -7.8754596256  |
| C | 5.9782475715  | 0.0016408752  | -9.6407077164  |
| H | 5.9761534374  | 2.1461192284  | -9.3917461569  |
| C | 7.2279643357  | -1.2408795855 | -7.8736092341  |
| H | 5.9837006737  | -2.1426289557 | -9.3878126810  |
| H | 8.1226008273  | 0.0075858975  | -6.3578267144  |
| H | 7.2461857452  | 2.1548254344  | -7.2550714782  |
| H | 8.1256650763  | 1.2722286312  | -8.4982189724  |
| H | 6.8586688519  | 0.0016709201  | -10.2918095343 |
| H | 5.0963929708  | 0.0001414723  | -10.2900312493 |
| H | 8.1290236854  | -1.2603983485 | -8.4964381158  |
| H | 7.2516713723  | -2.1413794735 | -7.2504037938  |

**Dimer 18:**  $\text{H}_5\text{C}_6\text{H}-\text{HC}_6\text{H}_5$  (benzene)

|   |               |               |               |
|---|---------------|---------------|---------------|
| C | -1.8886433495 | 0.4272969555  | -0.0023207220 |
| C | -0.5011088215 | 0.4270111546  | -0.0019362631 |
| C | 0.1907353463  | 1.6294635249  | -0.0000457465 |
| C | -0.5009853069 | 2.8319913063  | 0.0012476671  |
| C | -1.8885294418 | 2.8318375519  | 0.0007452587  |
| C | -2.5816137257 | 1.6295992353  | -0.0008973882 |
| H | -2.4307227463 | -0.5111284562 | -0.0036850862 |
| H | 0.0424161171  | -0.5105849175 | -0.0029922318 |
| H | 0.0426887290  | 3.7695039862  | 0.0027632426  |
| H | -2.4305864714 | 3.7702796370  | 0.0016667416  |
| H | -3.6653376103 | 1.6296568270  | -0.0009757388 |
| H | 1.2740659167  | 1.6293969842  | 0.0005073145  |
| C | 4.6329088738  | 1.6293763963  | 0.0024390280  |
| C | 5.3249574838  | 1.6277637110  | 1.2049445003  |

|   |              |              |               |
|---|--------------|--------------|---------------|
| C | 5.3260483855 | 1.6310847575 | -1.1994379419 |
| C | 6.7125496307 | 1.6280234319 | 1.2052165362  |
| H | 4.7825718668 | 1.6263473713 | 2.1431521121  |
| C | 6.7136497778 | 1.6314609720 | -1.1984511490 |
| H | 4.7844567544 | 1.6321542240 | -2.1381079604 |
| C | 7.4066060820 | 1.6299793310 | 0.0037030499  |
| H | 7.2541525322 | 1.6268150955 | 2.1438195148  |
| H | 7.2561739899 | 1.6330264855 | -2.1365247806 |
| H | 8.4904328331 | 1.6304335782 | 0.0042129079  |
| H | 3.5493067642 | 1.6293964868 | 0.0019374947  |

**Dimer 19:**  $\text{H}_5\text{C}_6\text{H}-\text{HC}_6\text{H}_5$  (Triprismane)

|   |               |               |               |
|---|---------------|---------------|---------------|
| C | -0.6654161080 | -0.0678866446 | -0.6372746920 |
| C | 0.8274273122  | -0.2367315119 | -0.4705247402 |
| C | 0.2164639032  | 1.1460808224  | -0.4520997173 |
| C | -0.8495023996 | -0.1686820622 | 0.8961582965  |
| C | 0.6437916028  | -0.3384413441 | 1.0630290165  |
| C | 0.0336278928  | 1.0445883386  | 1.0815210985  |
| H | -1.2945932140 | -0.3394860683 | -1.4727392445 |
| H | -1.6586624173 | -0.5294803097 | 1.5149923483  |
| H | 0.0331422162  | 1.7804870751  | 1.8726843724  |
| H | 1.1974607327  | -0.8510236290 | 1.8366211687  |
| H | 1.5468765138  | -0.6637314526 | -1.1545050480 |
| H | 0.3820330911  | 1.9816718787  | -1.1167034110 |
| C | 0.9048528427  | 4.3647830623  | -3.4932383800 |
| C | -0.0096443177 | 4.9397555519  | -4.6007343307 |
| C | 2.1194049337  | 4.6480382267  | -4.3481484240 |
| C | 1.6120534554  | 5.6959922099  | -3.3836851428 |
| C | 1.2043848752  | 5.2238486867  | -5.4558717023 |
| C | 0.6964596074  | 6.2721319328  | -4.4913447243 |
| H | -1.0235854992 | 4.7218008138  | -4.9040702742 |
| H | 3.0767964731  | 4.1474500448  | -4.3716046268 |
| H | 2.1103967585  | 6.1413844085  | -2.5346799130 |
| H | 1.2887048858  | 5.2610177827  | -6.5324903683 |
| H | 0.3221584948  | 7.2663977248  | -4.6892264553 |
| H | 0.7533846244  | 3.6043423929  | -2.7407535763 |

**Dimer 20:**  $\text{H}_9\text{C}_{10}\text{H}-\text{HC}_{10}\text{H}_9$  (Pentaprismane)

|   |               |               |               |
|---|---------------|---------------|---------------|
| C | -0.2524600070 | -1.0133455480 | -1.3084510286 |
| C | 1.2023428909  | -0.6801342326 | -0.8600567007 |
| C | -0.5691593379 | 0.4981829316  | -1.4079848244 |
| C | -0.5902209567 | -1.4817671976 | 0.1277872283  |
| C | 0.8855714273  | 0.8327998953  | -0.9591324579 |
| C | 0.8650055577  | -1.1465025881 | 0.5770294549  |
| C | -1.1044470424 | 0.9647410555  | -0.0329415372 |
| C | -1.1153066994 | -0.2577621954 | 0.9165880389  |
| C | 0.3502350756  | 1.2997032063  | 0.4164666313  |
| C | 0.3394462547  | 0.0777885855  | 1.3649913630  |
| H | 2.0858098912  | -1.0751905679 | -1.3590849713 |
| H | -1.0182674282 | 0.8909791720  | -2.3188994937 |
| H | -1.0510233414 | -2.4565990155 | 0.2788110131  |
| H | 1.5501816685  | 1.4840261726  | -1.5244825314 |

|   |               |               |               |
|---|---------------|---------------|---------------|
| H | 1.5169913655  | -1.8630801646 | 1.0739856731  |
| H | -1.9229990685 | 1.6813872172  | 0.0087838480  |
| H | -1.9403844277 | -0.3861589833 | 1.6154650559  |
| H | 0.6444926639  | 2.2741908901  | 0.8031900561  |
| H | 0.6268124576  | 0.2066334536  | 2.4072871760  |
| H | -0.4825668974 | -1.6637823038 | -2.1502485480 |
| C | -0.7138634707 | -3.6457930115 | -4.7080799530 |
| C | -0.4123438040 | -5.1606791128 | -4.6110405153 |
| C | -2.1763598896 | -3.9634756864 | -5.1428221942 |
| C | -0.3840570508 | -3.1815950449 | -6.1474921840 |
| C | 0.1043515776  | -5.6336930377 | -5.9909146209 |
| C | -1.8748256562 | -5.4796841804 | -5.0459485470 |
| H | 0.0415899904  | -5.5578881175 | -3.7044500564 |
| C | -1.8471215428 | -3.5008517957 | -6.5830218950 |
| H | -3.0510613421 | -3.5589723149 | -4.6359986414 |
| C | 0.1199106049  | -4.4116312329 | -6.9407528893 |
| H | 0.0861544968  | -2.2120280105 | -6.3032607761 |
| C | -1.3581995382 | -5.9525854164 | -6.4264608017 |
| H | 0.9140524241  | -6.3598334943 | -6.0404490003 |
| H | -2.5406188269 | -6.1235645651 | -4.4736099424 |
| C | -1.3425653281 | -4.7309797595 | -7.3753750645 |
| H | -2.4955613129 | -2.7769212742 | -7.0739068558 |
| H | 0.9399080320  | -4.2924099727 | -7.6471930399 |
| H | -1.6673627213 | -6.9235425482 | -6.8104016185 |
| H | -1.6411534792 | -4.8567877106 | -8.4148874217 |
| H | -0.4692830292 | -2.9978037567 | -3.8684757682 |

**Dimer 21:** H<sub>11</sub>C<sub>12</sub>H—HC<sub>12</sub>H<sub>11</sub> (Hexaprismane)

|   |               |               |               |
|---|---------------|---------------|---------------|
| C | -0.7937701194 | -3.9693770211 | -4.7237895521 |
| C | -0.6010539242 | -5.4878778222 | -4.4913639555 |
| C | -2.2499761921 | -4.2270055090 | -5.2044260931 |
| C | -0.4498223636 | -3.3471050274 | -6.0980853218 |
| C | -0.0688192361 | -6.3865351320 | -5.6335518465 |
| C | -2.0570530735 | -5.7437206207 | -4.9711506386 |
| H | -0.2696374056 | -5.7639816393 | -3.4906853364 |
| C | -1.9048459527 | -3.6054998308 | -6.5796552724 |
| H | -3.1066620159 | -3.7840830727 | -4.6971486332 |
| C | 0.0881995877  | -4.2442937497 | -7.2381553574 |
| H | -0.0325673881 | -2.3412261262 | -6.0611849776 |
| C | -1.5250201606 | -6.6397890709 | -6.1143385878 |
| H | 0.5770115408  | -7.2051661188 | -5.3168566836 |
| C | -1.3668415239 | -4.5002908053 | -7.7221949313 |
| H | -2.5568001372 | -2.7917982883 | -6.8963273398 |
| H | 0.8330989979  | -3.7777212461 | -7.8821057995 |
| H | -1.9484419014 | -7.6430751463 | -6.1541549920 |
| H | -1.6922728153 | -4.2206467014 | -8.7238037985 |
| H | -0.5815145091 | -3.3386504448 | -3.8610192820 |
| C | 0.2782824250  | -5.7632082978 | -7.0064975535 |
| H | 1.1347696239  | -6.2051612447 | -7.5148520329 |
| C | -1.1777193850 | -6.0181950699 | -7.4891464687 |
| H | -1.3903695664 | -6.6509038666 | -8.3503729471 |
| H | -2.7966199842 | -6.2109703017 | -4.3222520155 |
| C | -4.7519484066 | -8.0855193054 | -2.5924408034 |

|   |               |                |               |
|---|---------------|----------------|---------------|
| C | -6.2494919294 | -8.0312141936  | -2.9784575731 |
| C | -4.3396970362 | -8.2291919293  | -1.1086764830 |
| C | -4.7702648079 | -9.6328107867  | -2.7392581034 |
| C | -7.3374004249 | -8.1223022573  | -1.8821157238 |
| H | -6.4884497605 | -7.3747216644  | -3.8146342906 |
| C | -6.2680281364 | -9.5785743602  | -3.1254882109 |
| C | -5.4273147360 | -8.3148008218  | -0.0120716823 |
| H | -3.4335174395 | -7.6948698773  | -0.8243117927 |
| C | -4.3608570410 | -9.7773028164  | -1.2530350686 |
| H | -4.1241845804 | -10.1476624001 | -3.4498411845 |
| H | -8.2302213413 | -7.5245508528  | -2.0637074126 |
| C | -6.9266052039 | -8.2636965621  | -0.3970432869 |
| C | -7.3530610559 | -9.6703887121  | -2.0266242606 |
| H | -6.5219820182 | -10.0588313534 | -4.0700831469 |
| H | -5.1752428432 | -7.8279346821  | 0.9295761923  |
| C | -5.4463255806 | -9.8625944844  | -0.1535866944 |
| H | -3.4714742490 | -10.3810241737 | -1.0744956688 |
| H | -7.5706454788 | -7.7481208855  | 0.3147702193  |
| C | -6.9432692394 | -9.8118061864  | -0.5404053375 |
| H | -8.2557073997 | -10.2106841095 | -2.3102979890 |
| H | -5.2041329076 | -10.5127242776 | 0.6865900763  |
| H | -7.6013248211 | -10.4344451985 | 0.0650080132  |
| H | -4.0957875939 | -7.4632659956  | -3.1994031012 |

**Dimer 22:**  $\text{H}_{13}\text{C}_{14}\text{H}-\text{HC}_{14}\text{H}_{13}$  (Heptaprismane)

|   |               |               |               |
|---|---------------|---------------|---------------|
| C | -2.0835613695 | -0.3726119953 | -0.1371003795 |
| C | -1.4077653649 | -1.7457682381 | 0.1059386653  |
| C | -0.9002861813 | -1.7566870137 | -1.3655586290 |
| C | -1.5754432043 | -0.3838157126 | -1.6082164625 |
| C | -0.9812568972 | 1.0335036253  | -1.4148389338 |
| C | -1.4897114651 | 1.0452658743  | 0.0561074028  |
| C | -0.0732149561 | 1.4418294461  | 0.5421361136  |
| C | 0.4349431715  | 1.4302246025  | -0.9287403129 |
| C | 1.6073704464  | 0.5068191416  | -0.5159445722 |
| C | 1.0994390826  | 0.5173448886  | 0.9551996415  |
| C | 1.1451801075  | -1.0310477971 | 0.9821428459  |
| C | 0.0300933917  | -2.0378543347 | 0.6035047554  |
| C | 0.5369878492  | -2.0478576667 | -0.8674823983 |
| C | 1.6512666959  | -1.0407528267 | -0.4891049419 |
| H | -3.1552724148 | -0.4005144531 | 0.0644883383  |
| H | -2.1202599805 | -2.5020935665 | 0.4381881449  |
| H | -2.2945594193 | -0.4188337069 | -2.4278421716 |
| H | -2.2465209985 | 1.7695796484  | 0.3605496571  |
| H | -1.2600467990 | -2.5204228289 | -2.0564770215 |
| H | 0.0812514328  | -2.9500512781 | 1.1997459066  |
| H | 0.9414650801  | -2.9676204995 | -1.2927650484 |
| H | -1.3849244047 | 1.7500697246  | -2.1315245179 |
| H | 0.7829535085  | 2.3565824628  | -1.3878134286 |
| H | -0.0774641579 | 2.3755500461  | 1.1062625903  |
| H | 1.7163835762  | 0.9606941361  | 1.7380310702  |
| H | 2.5786757269  | 0.9415468265  | -0.7567907911 |
| H | 1.7882631644  | -1.4101941881 | 1.7776177574  |
| H | 2.6456737745  | -1.4264147855 | -0.7157975748 |

|   |               |               |               |
|---|---------------|---------------|---------------|
| C | 5.5855584725  | -2.6093754144 | -0.9559979780 |
| C | 6.5150517092  | -1.7252800391 | -1.8355339199 |
| C | 6.4913339271  | -2.3439585809 | 0.2726703423  |
| C | 5.6762598376  | -3.7488536444 | -2.0011793596 |
| C | 7.4232104233  | -1.4609727578 | -0.6077474181 |
| C | 6.6078778692  | -2.8649663334 | -2.8806382828 |
| H | 6.1307436415  | -0.8006753747 | -2.2688310130 |
| C | 7.7163208303  | -3.1561421749 | 0.7566184850  |
| H | 5.9402120931  | -1.8934954161 | 1.0994588706  |
| C | 6.7015497686  | -4.9072518845 | -2.0764302503 |
| H | 4.6946430230  | -4.0406577545 | -2.3772772417 |
| C | 8.6488816913  | -2.2744700222 | -0.1235012909 |
| H | 7.5240201381  | -0.3965318636 | -0.3915019538 |
| C | 7.6336320840  | -4.0235217483 | -2.9550435422 |
| H | 6.2755267945  | -2.5456655575 | -3.8693552509 |
| C | 8.3363854713  | -4.4327697985 | 0.1342528317  |
| H | 7.8203873960  | -3.1368844986 | 1.8423749146  |
| C | 7.8867511347  | -5.2120768883 | -1.1261605174 |
| H | 6.2653505997  | -5.8154846297 | -2.4946455502 |
| C | 9.2701343362  | -3.5508058095 | -0.7448292681 |
| H | 9.4001049021  | -1.6412649844 | 0.3508559542  |
| C | 8.8197344092  | -4.3285829662 | -2.0053045569 |
| H | 7.8452241820  | -4.3192524826 | -3.9835764256 |
| H | 8.7686828490  | -5.0892727846 | 0.8907074934  |
| H | 8.0790409466  | -6.2822584217 | -1.0384614833 |
| H | 10.3502900401 | -3.5947449135 | -0.5984509192 |
| H | 9.6596224477  | -4.7847707818 | -2.5310698952 |
| H | 4.5556240371  | -2.2981388454 | -0.7786724199 |

**Dimer 23:**  $\text{H}_{39}\text{C}_{40}\text{H}-\text{HC}_{39}\text{H}_{40}$  Dodecahedrane

|   |               |              |               |
|---|---------------|--------------|---------------|
| C | 0.4417432342  | 2.9412859596 | 1.9010751563  |
| C | -0.1758873784 | 1.7585296238 | 1.1268205557  |
| H | 0.6972751322  | 2.6480236008 | 2.9204699273  |
| H | -0.2318262815 | 0.8690771531 | 1.7562468602  |
| C | 0.4481016628  | 2.9414415545 | -2.1406292836 |
| C | 1.7004702543  | 3.4107281317 | -1.3667322833 |
| H | 0.7064595403  | 2.6467768704 | -3.1591458628 |
| H | 2.5910651037  | 3.3547821819 | -1.9942447021 |
| C | -0.5721867518 | 4.0979843685 | -2.1428077965 |
| C | -1.8269181850 | 3.6282494889 | -1.3723758885 |
| H | -0.8275461121 | 4.3909985926 | -3.1623266628 |
| H | -2.7156032692 | 3.6837704629 | -2.0026447722 |
| C | -0.5783842799 | 4.0981349875 | 1.8993432659  |
| C | 0.0414831666  | 5.2805909554 | 1.1264961870  |
| H | -0.8370528202 | 4.3914429244 | 2.9179509736  |
| H | 0.0954194559  | 6.1704883088 | 1.7555072150  |
| C | -1.5797983466 | 2.1812926842 | 0.6481958716  |
| H | -2.3436131265 | 1.5062892506 | 1.0373799482  |
| C | 1.4468072734  | 4.8576879160 | 0.6523526790  |
| H | 2.2095764820  | 5.5325226269 | 1.0439036393  |
| C | 1.4492811464  | 4.8576270177 | -0.8895004929 |
| H | 2.2132690880  | 5.5323761804 | -1.2788032836 |
| C | -1.5772839758 | 2.1816617536 | -0.8935878214 |

|   |               |               |               |
|---|---------------|---------------|---------------|
| H | -2.3390718647 | 1.5058181847  | -1.2858872339 |
| C | 0.6928353278  | 1.4984962712  | -0.1190475963 |
| H | 1.0734829921  | 0.4756581393  | -0.1194210807 |
| C | -1.9802487724 | 4.5229060754  | -0.1238894928 |
| H | -2.9463668904 | 5.0301535779  | -0.1254504760 |
| C | -0.8234216957 | 5.5406654980  | -0.1221783949 |
| H | -1.2052575777 | 6.5628433538  | -0.1228671703 |
| C | 1.8500239565  | 2.5158466540  | -0.1175641713 |
| H | 2.8159590199  | 2.0082174890  | -0.1160327120 |
| C | 0.0453838518  | 5.2804966920  | -1.3681140525 |
| H | 0.1013385974  | 6.1702321918  | -1.9971732889 |
| C | -1.8306202829 | 3.6282998062  | 1.1252923179  |
| H | -2.7213127695 | 3.6841462901  | 1.7526938741  |
| C | 1.6963605437  | 3.4108065782  | 1.1307047085  |
| H | 2.5850646136  | 3.3551373104  | 1.7609384030  |
| C | -0.1717254817 | 1.7610515233  | -1.3663459047 |
| H | -0.2256673410 | 0.8724454764  | -1.9952411216 |
| H | -0.3310909127 | -0.7320938128 | -3.1446243720 |
| C | -0.3843524056 | -1.6204466530 | -3.7739349789 |
| C | 1.0218973106  | -2.0405784855 | -4.2450449942 |
| C | -1.0050502168 | -2.8013362615 | -3.0012049390 |
| C | -1.2474018668 | -1.3572890848 | -5.0221393351 |
| C | 1.0266583665  | -2.0390269732 | -5.7867783070 |
| H | 1.7831145146  | -1.3649864711 | -3.8512501680 |
| C | 1.2711046199  | -3.4873929505 | -3.7667829419 |
| C | 0.0153993473  | -3.9577551561 | -2.9983077318 |
| C | -2.2561980299 | -3.2704880606 | -3.7772304267 |
| H | -1.2649191852 | -2.5071653054 | -1.9829133787 |
| C | -2.4040692931 | -2.3750754524 | -5.0261664334 |
| H | -1.6291265008 | -0.3348523610 | -5.0210783931 |
| C | -0.3766769893 | -1.6159042577 | -6.2670433875 |
| H | 1.7912325079  | -1.3639318887 | -6.1743259900 |
| C | 1.2783741251  | -3.4857342298 | -6.2643871405 |
| H | 2.1589126873  | -3.5431012430 | -3.1353106848 |
| C | 1.4263452223  | -4.3812032648 | -5.0155382302 |
| H | 0.2693951585  | -4.2514039083 | -1.9786214877 |
| C | -0.6009309683 | -5.1399424868 | -3.7746627866 |
| H | -3.1478009602 | -3.2147429920 | -3.1511456215 |
| C | -2.0041788622 | -4.7170306533 | -4.2550488685 |
| C | -2.2483609901 | -3.2689076401 | -6.2747811456 |
| H | -3.3703631069 | -1.8682144535 | -5.0290130756 |
| H | -0.3201967579 | -0.7256027511 | -6.8952832742 |
| C | -0.9928229742 | -2.7984768784 | -7.0431139744 |
| C | 0.0274349320  | -3.9552530571 | -7.0405441706 |
| H | 2.1700131583  | -3.5410619879 | -6.8904808204 |
| C | 0.2697103699  | -5.3991409607 | -5.0195685516 |
| H | 2.3925093424  | -4.8883470299 | -5.0129454526 |
| H | -0.6576404914 | -6.0300477427 | -3.1461852711 |
| C | -1.9993637208 | -4.7160246380 | -5.7969786321 |
| H | -2.7686859223 | -5.3921287067 | -3.8673621023 |
| H | -3.1361510662 | -3.2127985220 | -6.9062273807 |
| H | -1.2468498094 | -2.5047661631 | -8.0627776687 |
| C | -0.5933108098 | -5.1383208749 | -6.2693732440 |
| H | 0.2877142646  | -4.2479217550 | -8.0589330928 |



|   |               |               |               |
|---|---------------|---------------|---------------|
| H | 0.6516042704  | -6.4212973592 | -5.0189494101 |
| H | -2.7614562272 | -5.3906708720 | -6.1901501884 |
| H | -0.6461201203 | -6.0277974813 | -6.8990749443 |

**Dimer 24:** H<sub>5</sub>C<sub>6</sub>H—Tetrahedrane

|   |               |               |               |
|---|---------------|---------------|---------------|
| C | -0.8072131836 | -0.6872439668 | -0.0175338828 |
| C | 0.6857423740  | -0.8560504161 | 0.1492237906  |
| C | 0.0746863487  | 0.5266863632  | 0.1677370793  |
| C | -0.9912073284 | -0.7879780934 | 1.5159520303  |
| C | 0.5021124699  | -0.9576940409 | 1.6828293924  |
| C | -0.1081025396 | 0.4254050124  | 1.7014067276  |
| H | -1.4365452604 | -0.9584934451 | -0.8528879327 |
| H | -1.8001423106 | -1.1489328333 | 2.1348878138  |
| H | -0.1088468230 | 1.1614143186  | 2.4923418496  |
| H | 1.0555756835  | -1.4705756230 | 2.4563037488  |
| H | 1.4054303432  | -1.2826590582 | -0.5346262675 |
| H | 0.2404765757  | 1.3621437705  | -0.4967879826 |
| H | 0.6196666538  | 3.0199175874  | -2.1558853145 |
| C | 0.7905369323  | 3.7655312361  | -2.9024151626 |
| C | 0.2867244234  | 5.0174513742  | -3.4831912598 |
| C | 0.9231751791  | 4.0120810542  | -4.3449978250 |
| C | 1.7339298609  | 4.7810097445  | -3.3904244205 |
| H | -0.4816374694 | 5.7585692288  | -3.4274979323 |
| H | 0.9097871940  | 3.5582120498  | -5.3130521433 |
| H | 2.6845433467  | 5.2415655273  | -3.2247161485 |

**Dimer 25:** (C<sub>2</sub>H<sub>5</sub>)H<sub>2</sub>CH—HCH<sub>3</sub>

|   |               |               |              |
|---|---------------|---------------|--------------|
| H | -0.0014146100 | -0.0000008500 | 4.3674171100 |
| C | 0.0023330100  | -0.0000004900 | 5.4591480200 |
| C | 1.4145922200  | 0.0001383100  | 6.0207931600 |
| H | -0.5512135600 | 0.8812307100  | 5.7941256100 |
| H | -0.5510399700 | -0.8813396100 | 5.7941271800 |
| H | 1.9567109800  | 0.8747777800  | 5.6480102800 |
| H | 1.9568826300  | -0.8743954600 | 5.6480113300 |
| C | 1.4278454600  | 0.0001393500  | 7.5401739300 |
| H | 0.9135484000  | -0.8810027900 | 7.9331436400 |
| H | 0.9133757200  | 0.8811807700  | 7.9331431800 |
| H | 2.4441837700  | 0.0002389500  | 7.9388489900 |
| H | -0.0014172700 | -0.0000011100 | 1.9174171100 |
| C | -0.0013997500 | -0.0000100600 | 0.8285159400 |
| H | 0.5114311600  | -0.8898722000 | 0.4664784900 |
| H | -1.0285213800 | 0.0007658100  | 0.4666085500 |
| H | 0.5127174300  | 0.8891103900  | 0.4664891500 |

**Dimer 26:** Cubane—HCH(CH<sub>3</sub>)<sub>2</sub>

|   |               |               |              |
|---|---------------|---------------|--------------|
| H | 0.0180062346  | -0.0250547974 | 4.2202116197 |
| C | -0.0012311017 | 0.0083822258  | 5.3139799327 |
| C | 1.4206623521  | -0.0099303285 | 5.8488348373 |
| H | -0.5267913423 | -0.8970670867 | 5.6327671492 |
| H | 1.4263059151  | -0.0063962179 | 6.9421740166 |

|   |               |               |               |
|---|---------------|---------------|---------------|
| H | 1.9706669102  | -0.8924359983 | 5.5159121322  |
| H | 1.9748898269  | 0.8722531386  | 5.5172364839  |
| C | -0.7769197955 | 1.2331793298  | 5.7678709540  |
| H | -1.7957548037 | 1.2359510225  | 5.3752742388  |
| H | -0.8393479404 | 1.2745523370  | 6.8585131410  |
| H | -0.2876560440 | 2.1516298876  | 5.4329280667  |
| H | 0.0177656222  | -0.0248711365 | 1.9569652626  |
| C | 0.0179178890  | -0.0249300120 | 0.8693837721  |
| C | 0.6246380448  | 1.0936032948  | -0.0300430693 |
| C | 0.6829261337  | -1.1105319095 | -0.0292142422 |
| C | -1.2547437666 | -0.0589002345 | -0.0301471796 |
| C | 1.2902292367  | 0.0081428631  | -0.9297081011 |
| C | -0.6473692812 | 1.0597276626  | -0.9306695869 |
| H | 1.1140869061  | 1.9953403916  | 0.3326751528  |
| C | -0.5890890673 | -1.1443209867 | -0.9298234093 |
| H | 1.2202690658  | -1.9845227020 | 0.3335586032  |
| H | -2.2799295019 | -0.0867734392 | 0.3332184735  |
| C | 0.0176862515  | -0.0258333350 | -1.8298406915 |
| H | 2.3155160165  | 0.0360067684  | -1.2926753646 |
| H | -1.1847904336 | 1.9337987027  | -1.2930361230 |
| H | -1.0786462397 | -2.0461460057 | -1.2920674013 |
| H | 0.0182030028  | -0.0259911449 | -2.9176074575 |

**Dimer 27:**  $\text{H}_3\text{CSiH}_2\text{H}_2\text{SiH}-\text{HSiH}_2\text{SiH}_2$

|    |               |               |               |
|----|---------------|---------------|---------------|
| H  | -0.2394799800 | 0.0000000100  | 4.5482453700  |
| H  | -0.7949319600 | -1.2077581000 | 6.5646492900  |
| H  | -0.7949319700 | 1.2077581400  | 6.5646492800  |
| H  | 2.8213041300  | -1.2034116500 | 6.0783499600  |
| H  | 2.8213043100  | 1.2034114000  | 6.0783498700  |
| Si | -0.0986036500 | 0.0000000200  | 6.0325704600  |
| C  | 2.3591351000  | 0.0000000200  | 8.5407023200  |
| H  | 3.4150547500  | -0.0000005900 | 8.8173577000  |
| H  | 1.8920650300  | 0.8835308000  | 8.9793157500  |
| H  | 1.8920639800  | -0.8835301000 | 8.9793159500  |
| Si | 2.1604396700  | -0.0000000500 | 6.6676036700  |
| H  | -0.2408528600 | 0.0000000100  | 2.0482457500  |
| Si | -0.2402637900 | 0.0000000100  | 0.5586805800  |
| Si | -2.4417266300 | 0.0000000100  | -0.2510077600 |
| H  | 0.4906756400  | -1.2102360900 | 0.0871784800  |
| H  | 0.4906756400  | 1.2102361100  | 0.0871784800  |
| H  | -2.4524933700 | 0.0000000100  | -1.7412748200 |
| H  | -3.1700562600 | -1.2097774000 | 0.2258242400  |
| H  | -3.1700562600 | 1.2097774200  | 0.2258242400  |

**Dimer 28:**  $(\text{CH}_3)_3\text{CH}-\text{HCH}_2\text{CH}_3$

|   |               |              |               |
|---|---------------|--------------|---------------|
| H | -0.0260784541 | 0.0528243955 | -1.9751729028 |
| C | -0.0066980864 | 0.0135565051 | -3.0709281182 |
| C | -0.6117576848 | 1.3083727860 | -3.5945521382 |
| H | -0.6167373567 | 1.3176307096 | -4.6889077278 |
| H | -1.6438809062 | 1.4305448100 | -3.2574056869 |

|   |               |               |               |
|---|---------------|---------------|---------------|
| H | -0.0429132402 | 2.1786911305  | -3.2584133704 |
| C | 1.4446248078  | -0.1277754502 | -3.5079506009 |
| H | 1.8930042496  | -1.0423458684 | -3.1128031511 |
| H | 1.5159835073  | -0.1689705592 | -4.5992038601 |
| H | 2.0475480653  | 0.7170237439  | -3.1672440093 |
| C | -0.8275433867 | -1.1908336565 | -3.5095761542 |
| H | -0.4249283425 | -2.1194850324 | -3.0981219188 |
| H | -1.8675017424 | -1.1032721162 | -3.1864516296 |
| H | -0.8248955278 | -1.2832636543 | -4.6000545243 |
| H | -0.0261054782 | 0.0528522113  | 0.2750683529  |
| C | -0.0260686451 | 0.0528011412  | 1.3670157320  |
| C | -0.9964133248 | 1.0820305166  | 1.9209025662  |
| H | 0.9970030801  | 0.2513738969  | 1.6930894390  |
| H | -0.2843813126 | -0.9567899893 | 1.6931062542  |
| H | -0.9968579007 | 1.0824726235  | 3.0129551604  |
| H | -0.7378575443 | 2.0909907623  | 1.5927655007  |
| H | -2.0188817067 | 0.8831670841  | 1.5927905171  |

**Dimer 29:** H<sub>8</sub>C<sub>3</sub>-C<sub>3</sub>H<sub>8</sub> (4C-12)

|   |              |               |               |
|---|--------------|---------------|---------------|
| C | 2.1911341907 | 3.3783829701  | 0.7001526766  |
| C | 3.1814456860 | 2.3215862728  | 0.2388471677  |
| C | 4.2852796373 | 2.8882099863  | -0.6377432979 |
| H | 1.4046302831 | 2.9478043569  | 1.3236600037  |
| H | 4.9874909381 | 2.1139807287  | -0.9539806140 |
| H | 1.7091428823 | 3.8654597634  | -0.1516992904 |
| H | 2.6889186095 | 4.1567287460  | 1.2844570580  |
| H | 3.6241528325 | 1.8325568228  | 1.1126945110  |
| H | 2.6480692239 | 1.5367897146  | -0.3072659481 |
| H | 3.8735406572 | 3.3510753982  | -1.5386742567 |
| H | 4.8544097052 | 3.6561662207  | -0.1069085733 |
| C | 2.1087665742 | -1.8545554067 | 0.7506722393  |
| C | 3.3594612602 | -1.9985778198 | -0.1007788451 |
| C | 4.6377334198 | -1.8731410540 | 0.7116510406  |
| H | 1.1994082942 | -1.9498303783 | 0.1536611413  |
| H | 5.5266993394 | -1.9781532739 | 0.0862149960  |
| H | 2.0816636388 | -0.8801482543 | 1.2455626306  |
| H | 2.0759225197 | -2.6192387062 | 1.5313336349  |
| H | 3.3444835582 | -2.9666508891 | -0.6110225378 |
| H | 3.3534207432 | -1.2409531905 | -0.8910441495 |
| H | 4.6929673838 | -0.9005899898 | 1.2078752025  |
| H | 4.6849786228 | -2.6405320180 | 1.4888652105  |

**Dimer 30:** H<sub>8</sub>C<sub>3</sub>-C<sub>3</sub>H<sub>8</sub> (4C-13)

|   |              |               |               |
|---|--------------|---------------|---------------|
| C | 3.0492093650 | -1.3117795113 | 0.6462699177  |
| C | 4.3374863270 | -0.9043024106 | -0.0494982514 |
| C | 5.5588430233 | -1.0302508734 | 0.8458685432  |
| H | 2.1870628778 | -1.2278559420 | -0.0190984244 |
| H | 6.4729205975 | -0.7392971917 | 0.3234507428  |
| H | 2.8555690043 | -0.6835484255 | 1.5204239009  |
| H | 3.1003440348 | -2.3473751616 | 0.9938900204  |
| H | 4.4781017381 | -1.5190236868 | -0.9445242163 |
| H | 4.2501365805 | 0.1274741797  | -0.4047787900 |

|   |               |               |               |
|---|---------------|---------------|---------------|
| H | 5.4656882246  | -0.3951846832 | 1.7309422072  |
| H | 5.6878686576  | -2.0591181480 | 1.1931861098  |
| C | 0.1933149198  | 3.4403407928  | 0.7816593493  |
| C | 1.0324764881  | 3.4368005637  | -0.4846901310 |
| C | 2.5137490863  | 3.2377726951  | -0.2107540326 |
| H | 0.2920435198  | 2.4951118335  | 1.3228207819  |
| H | 3.0979463023  | 3.2491023493  | -1.1334721555 |
| H | -0.8666525365 | 3.5886285327  | 0.5633724949  |
| H | 0.5075254439  | 4.2392595863  | 1.4592025049  |
| H | 0.6771067889  | 2.6487957991  | -1.1562298760 |
| H | 0.8853346450  | 4.3787938991  | -1.0225442093 |
| H | 2.9034269502  | 4.0263645172  | 0.4388348993  |
| H | 2.6975379618  | 2.2818412858  | 0.2872986143  |

**Dimer 31:** H<sub>12</sub>C<sub>5</sub>-C<sub>5</sub>H<sub>12</sub> (6C-12)

|   |              |               |               |
|---|--------------|---------------|---------------|
| C | 2.3220386418 | 3.1285274296  | 0.7623409119  |
| C | 3.3063182934 | 2.1865516973  | 0.0903396719  |
| C | 4.5432756891 | 2.8932986861  | -0.4412894784 |
| C | 5.5345489468 | 1.9594285917  | -1.1157487726 |
| C | 6.7663922160 | 2.6742066729  | -1.6450356624 |
| H | 1.4514173597 | 2.5939952863  | 1.1469248077  |
| H | 7.4655312145 | 1.9781629571  | -2.1130312444 |
| H | 1.9622255010 | 3.8884375988  | 0.0638788113  |
| H | 2.7894635283 | 3.6502212698  | 1.6014261673  |
| H | 3.6132069194 | 1.4106324486  | 0.8007990473  |
| H | 2.8100786025 | 1.6603323980  | -0.7327888024 |
| H | 4.2379895638 | 3.6713020223  | -1.1520976955 |
| H | 5.0433390470 | 3.4191478801  | 0.3812114672  |
| H | 5.8406673060 | 1.1843330172  | -0.4038889314 |
| H | 5.0318616958 | 1.4332281904  | -1.9347425813 |
| H | 6.4979936858 | 3.4254287804  | -2.3921414894 |
| H | 7.2990881588 | 3.1875851000  | -0.8405338473 |
| C | 2.0210105999 | -1.9646472909 | 0.9778711252  |
| C | 3.2067939208 | -2.1838293264 | 0.0536416807  |
| C | 4.5411445837 | -2.1680045665 | 0.7827018861  |
| C | 5.7356972100 | -2.3874850644 | -0.1315117739 |
| C | 7.0639906239 | -2.3552610286 | 0.6057189963  |
| H | 1.0762851847 | -1.9674291816 | 0.4300489415  |
| H | 7.9057688553 | -2.5109930628 | -0.0720909731 |
| H | 2.1006000749 | -1.0057760958 | 1.4972522187  |
| H | 1.9658857222 | -2.7466269373 | 1.7400907488  |
| H | 3.0945361483 | -3.1395222719 | -0.4706379534 |
| H | 3.2145243620 | -1.4123835876 | -0.7245295697 |
| H | 4.6563894940 | -1.2101613650 | 1.3052894668  |
| H | 4.5368017472 | -2.9365464837 | 1.5656142850  |
| H | 5.6226969037 | -3.3480634878 | -0.6462544259 |
| H | 5.7317074230 | -1.6232564426 | -0.9168524498 |
| H | 7.2139336768 | -1.3940703184 | 1.1048882305  |
| H | 7.1078270998 | -3.1325435153 | 1.3731271869  |

**Dimer 32:** H<sub>12</sub>C<sub>5</sub>-C<sub>5</sub>H<sub>12</sub> (6C-13)

|   |              |               |              |
|---|--------------|---------------|--------------|
| C | 3.0094003828 | -1.6176852226 | 0.5015986250 |
|---|--------------|---------------|--------------|

|   |               |               |               |
|---|---------------|---------------|---------------|
| C | 4.2531277717  | -1.4678970548 | -0.3584478981 |
| C | 5.5444175355  | -1.6072101478 | 0.4325472309  |
| C | 6.7978186700  | -1.4589746692 | -0.4152967678 |
| C | 8.0800874675  | -1.5986665906 | 0.3883270241  |
| H | 2.0961101575  | -1.5089346892 | -0.0867990324 |
| H | 8.9653584168  | -1.4943203078 | -0.2422722928 |
| H | 2.9860161779  | -0.8642037068 | 1.2940114287  |
| H | 2.9794060127  | -2.5988681744 | 0.9830502612  |
| H | 4.2404001081  | -2.2152326341 | -1.1593874852 |
| H | 4.2403872801  | -0.4924570180 | -0.8568161819 |
| H | 5.5595866068  | -0.8602463355 | 1.2357534654  |
| H | 5.5586909685  | -2.5835886427 | 0.9321846643  |
| H | 6.7805781345  | -2.2068618246 | -1.2156417075 |
| H | 6.7818048824  | -0.4835878392 | -0.9138261968 |
| H | 8.1378023953  | -0.8369799006 | 1.1699234137  |
| H | 8.1339419897  | -2.5748931082 | 0.8770361272  |
| C | 0.0090058497  | 3.6429731369  | 0.7724058059  |
| C | 1.1226526949  | 3.3988645236  | -0.2315476923 |
| C | 2.4839593875  | 3.2115716127  | 0.4190404206  |
| C | 3.6061228676  | 2.9696939585  | -0.5771700993 |
| C | 4.9651210371  | 2.7887922128  | 0.0784840449  |
| H | -0.0836167845 | 2.8059381944  | 1.4696508878  |
| H | 5.7497268063  | 2.6217067268  | -0.6631288110 |
| H | -0.9571567259 | 3.7718192668  | 0.2801319807  |
| H | 0.2020508997  | 4.5415910130  | 1.3644727210  |
| H | 0.8878167536  | 2.5141910412  | -0.8340135409 |
| H | 1.1728254067  | 4.2368689878  | -0.9357123794 |
| H | 2.7204486025  | 4.0954260623  | 1.0243780585  |
| H | 2.4356234798  | 2.3712859581  | 1.1226164754  |
| H | 3.3685226668  | 2.0848913045  | -1.1788958552 |
| H | 3.6486582741  | 3.8082287583  | -1.2815127595 |
| H | 5.2432444023  | 3.6714606917  | 0.6607052070  |
| H | 4.9656194241  | 1.9328644167  | 0.7591108579  |

**Dimer 33:** H<sub>16</sub>C<sub>7</sub>-C<sub>7</sub>H<sub>16</sub> (8C-12)

|   |              |               |               |
|---|--------------|---------------|---------------|
| C | 2.4010450741 | -3.3889270290 | -0.6145019342 |
| C | 3.3085997098 | -2.2621250001 | -0.1487446889 |
| C | 4.6444268168 | -2.7566928323 | 0.3843296109  |
| C | 5.5654565923 | -1.6400392317 | 0.8496684697  |
| C | 6.9048941298 | -2.1336704088 | 1.3733452773  |
| C | 7.8274933504 | -1.0133025148 | 1.8286661894  |
| C | 9.1661926521 | -1.5130222693 | 2.3458941329  |
| H | 1.4491422323 | -3.0109563721 | -0.9928005657 |
| H | 2.1834592724 | -4.0798701397 | 0.2041693816  |
| H | 2.8708810005 | -3.9664292916 | -1.4148946940 |
| H | 3.4879864482 | -1.5655502290 | -0.9750642540 |
| H | 2.8024174993 | -1.6812038953 | 0.6298894064  |
| H | 4.4670763589 | -3.4518156907 | 1.2136055865  |
| H | 5.1486803706 | -3.3411656495 | -0.3945587644 |
| H | 5.7367783070 | -0.9424926396 | 0.0209013739  |
| H | 5.0629826322 | -1.0587489569 | 1.6322257924  |
| H | 6.7369055507 | -2.8266695491 | 2.2066311728  |
| H | 7.4062063671 | -2.7185335782 | 0.5926431544  |

|   |               |               |               |
|---|---------------|---------------|---------------|
| H | 7.9896846684  | -0.3221361102 | 0.9939427130  |
| H | 7.3267223802  | -0.4299897673 | 2.6095778807  |
| H | 9.0326214796  | -2.1831546527 | 3.1992229686  |
| H | 9.7045566339  | -2.0688028999 | 1.5737051723  |
| H | 9.8063691485  | -0.6889347367 | 2.6678684030  |
| C | 2.0721237461  | 2.1019856273  | -0.6697057785 |
| C | 3.2264064964  | 2.3478888183  | 0.2870294286  |
| C | 4.5557245299  | 2.5516345784  | -0.4234858421 |
| C | 5.7181252784  | 2.8034593193  | 0.5227730311  |
| C | 7.0533443504  | 2.9724734604  | -0.1845589678 |
| C | 8.2124031564  | 3.2366393898  | 0.7633108690  |
| C | 9.5495879276  | 3.3612329692  | 0.0525122427  |
| H | 10.3631078893 | 3.5533328727  | 0.7551723074  |
| H | 1.1287884137  | 1.9618735454  | -0.1375750927 |
| H | 2.2475783764  | 1.2087710807  | -1.2752856595 |
| H | 1.9447343501  | 2.9435561182  | -1.3562314352 |
| H | 3.0112749991  | 3.2255504003  | 0.9066281358  |
| H | 3.3165222735  | 1.5044091787  | 0.9805428374  |
| H | 4.7727697407  | 1.6702171585  | -1.0392685060 |
| H | 4.4671966975  | 3.3913551986  | -1.1234921003 |
| H | 5.5099209435  | 3.6972079426  | 1.1232614590  |
| H | 5.7908190616  | 1.9729574633  | 1.2352739567  |
| H | 7.2665644379  | 2.0722514030  | -0.7741482651 |
| H | 6.9827750297  | 3.7934899034  | -0.9084180398 |
| H | 8.0105836660  | 4.1509317102  | 1.3322848220  |
| H | 8.2622967520  | 2.4285778269  | 1.5016660939  |
| H | 9.7919846658  | 2.4449188880  | -0.4924457949 |
| H | 9.5377885432  | 4.1795185917  | -0.6725614862 |

**Dimer 34:**  $H_{16}C_7-C_7H_{16}$  (8C-13)

|   |               |               |               |
|---|---------------|---------------|---------------|
| C | 2.9945407732  | -1.8076596393 | 0.2941995974  |
| C | 4.2566137206  | -1.6917797434 | -0.5438955216 |
| C | 5.5300312333  | -1.8578100016 | 0.2712168593  |
| C | 6.8011614645  | -1.7409879826 | -0.5546041125 |
| C | 8.0731154846  | -1.9041610892 | 0.2622702873  |
| C | 9.3453141512  | -1.7726606976 | -0.5605103762 |
| C | 10.6089324360 | -1.9309618114 | 0.2686795644  |
| H | 2.0942234347  | -1.6843282668 | -0.3113717809 |
| H | 2.9346065830  | -2.7835507904 | 0.7827909692  |
| H | 2.9735118853  | -1.0469178934 | 1.0791633835  |
| H | 4.2408232311  | -2.4423967610 | -1.3417276785 |
| H | 4.2750388067  | -0.7185458541 | -1.0470198191 |
| H | 5.5461710345  | -1.1082901713 | 1.0721193750  |
| H | 5.5117217117  | -2.8323432237 | 0.7740584305  |
| H | 6.7852888455  | -2.4912129856 | -1.3543892658 |
| H | 6.8176546806  | -0.7665822794 | -1.0573774005 |
| H | 8.0851854086  | -1.1595618928 | 1.0674957026  |
| H | 8.0633329786  | -2.8820053568 | 0.7588558712  |
| H | 9.3337396833  | -2.5190021334 | -1.3625216444 |
| H | 9.3526909957  | -0.7963301653 | -1.0575309702 |
| H | 10.6593517300 | -1.1726601752 | 1.0542607131  |
| H | 10.6410797841 | -2.9094951679 | 0.7548717060  |
| H | 11.5081161159 | -1.8350600770 | -0.3433483644 |

|   |               |              |               |
|---|---------------|--------------|---------------|
| C | 0.0118411519  | 3.7639768075 | 1.1191401357  |
| C | 1.1419359688  | 3.5342622754 | 0.1300301782  |
| C | 2.4809615831  | 3.2789704522 | 0.8037982952  |
| C | 3.6214359887  | 3.0541442238 | -0.1754104911 |
| C | 4.9638860935  | 2.8168016830 | 0.4971184318  |
| C | 6.1045465831  | 2.6020243869 | -0.4846054124 |
| C | 7.4456108143  | 2.3768979277 | 0.1932350562  |
| H | -0.1195029803 | 2.8990387779 | 1.7747383256  |
| H | 8.2444900890  | 2.2283271113 | -0.5364390661 |
| H | -0.9386536306 | 3.9427907258 | 0.6123130573  |
| H | 0.2160874459  | 4.6288963467 | 1.7559682287  |
| H | 0.8975122234  | 2.6853266081 | -0.5179580182 |
| H | 1.2331931688  | 4.4019031038 | -0.5326696364 |
| H | 2.7237836566  | 4.1272991783 | 1.4552946675  |
| H | 2.3916457869  | 2.4088240155 | 1.4656361209  |
| H | 3.3831578624  | 2.1991942829 | -0.8199206981 |
| H | 3.7009702599  | 3.9204566693 | -0.8434378465 |
| H | 5.2007480620  | 3.6695773444 | 1.1446820636  |
| H | 4.8885522325  | 1.9475483061 | 1.1618534427  |
| H | 5.8700128682  | 1.7460926077 | -1.1273114116 |
| H | 6.1724962386  | 3.4683238379 | -1.1520386935 |
| H | 7.7212079518  | 3.2315279682 | 0.8165490431  |
| H | 7.4188344084  | 1.4950995187 | 0.8387487020  |

**Dimer 35:** C<sub>6</sub>H<sub>6</sub> --- C<sub>6</sub>H<sub>6</sub>

|   |               |               |               |
|---|---------------|---------------|---------------|
| C | 0.9812382036  | -0.9812382036 | -2.0303796619 |
| C | -0.3588383700 | -1.3396540419 | -2.0299138414 |
| C | 1.3396540420  | 0.3588383700  | -2.0299138414 |
| C | -0.9812382036 | 0.9812382036  | -2.0303796619 |
| C | 0.3588383700  | 1.3396540419  | -2.0299138414 |
| C | -1.3396540420 | -0.3588383700 | -2.0299138414 |
| H | 1.7475365316  | -1.7475365315 | -2.0254816961 |
| H | -0.6400106814 | -2.3863549279 | -2.0252268750 |
| H | -2.3863549280 | -0.6400106813 | -2.0252268751 |
| H | -1.7475365316 | 1.7475365315  | -2.0254816961 |
| H | 0.6400106814  | 2.3863549279  | -2.0252268750 |
| H | 2.3863549280  | 0.6400106813  | -2.0252268751 |
| C | 0.9812382036  | -0.9812382036 | 2.0303796619  |
| C | 1.3396540420  | 0.3588383700  | 2.0299138414  |
| C | 0.3588383700  | 1.3396540419  | 2.0299138414  |
| C | -0.9812382036 | 0.9812382036  | 2.0303796619  |
| C | -1.3396540420 | -0.3588383700 | 2.0299138414  |
| C | -0.3588383700 | -1.3396540419 | 2.0299138414  |
| H | 1.7475365316  | -1.7475365315 | 2.0254816961  |
| H | 2.3863549280  | 0.6400106813  | 2.0252268751  |
| H | 0.6400106814  | 2.3863549279  | 2.0252268750  |
| H | -1.7475365316 | 1.7475365315  | 2.0254816961  |
| H | -2.3863549280 | -0.6400106813 | 2.0252268751  |
| H | -0.6400106814 | -2.3863549279 | 2.0252268750  |

**Dimer 36:** C<sub>2</sub>H<sub>4</sub> --- C<sub>2</sub>H<sub>4</sub>

|   |             |            |             |
|---|-------------|------------|-------------|
| C | -0.95963957 | 1.02733278 | -2.03182198 |
|---|-------------|------------|-------------|

|   |             |             |             |
|---|-------------|-------------|-------------|
| C | 0.31756923  | 1.36897317  | -2.03180662 |
| H | -1.75154858 | 1.76782901  | -2.02709693 |
| H | 0.63398232  | 2.40603395  | -2.02705839 |
| H | 1.10224852  | 0.62103065  | -2.02709496 |
| H | -1.26612262 | -0.01255989 | -2.02712693 |
| C | 0.31756923  | 1.36897317  | 2.03180662  |
| C | -0.95963957 | 1.02733278  | 2.03182198  |
| H | 0.63398232  | 2.40603395  | 2.02705839  |
| H | -1.75154858 | 1.76782901  | 2.02709693  |
| H | 1.10224852  | 0.62103065  | 2.02709496  |
| H | -1.26612262 | -0.01255989 | 2.02712693  |

**Dimer 37:** C<sub>6</sub>H<sub>6</sub> --- C<sub>2</sub>H<sub>4</sub>

|   |               |               |               |
|---|---------------|---------------|---------------|
| C | 0.9813883576  | -0.9812832878 | -2.0300376096 |
| C | -0.3590331703 | -1.3400783908 | -2.0277835804 |
| C | 1.3396637768  | 0.3588974812  | -2.0318365592 |
| C | -0.9812832879 | 0.9813883576  | -2.0300376096 |
| C | 0.3588974812  | 1.3396637768  | -2.0318365576 |
| C | -1.3400783909 | -0.3590331703 | -2.0277835820 |
| H | 1.7477621946  | -1.7475407223 | -2.0276763882 |
| H | -0.6402951080 | -2.3867533060 | -2.0262953476 |
| H | -2.3867533060 | -0.6402951080 | -2.0262953531 |
| H | -1.7475407223 | 1.7477621945  | -2.0276763882 |
| H | 0.6403299295  | 2.3861520785  | -2.0272885231 |
| H | 2.3861520786  | 0.6403299294  | -2.0272885287 |
| C | 1.3411122499  | 0.4060557297  | 2.0327668660  |
| C | 0.4060557296  | 1.3411122499  | 2.0327668636  |
| H | 2.3976105314  | 0.6501094434  | 2.0277093040  |
| H | 0.6501094434  | 2.3976105313  | 2.0277092985  |
| H | 1.0839142736  | -0.6468807308 | 2.0296805842  |
| H | -0.6468807309 | 1.0839142736  | 2.0296805808  |

**Dimer 38:** Ne -- Ne

|    |              |              |               |
|----|--------------|--------------|---------------|
| Ne | 0.0000000000 | 0.0000000000 | -1.5262500000 |
| Ne | 0.0000000000 | 0.0000000000 | 1.5262500000  |

**Dimer 39:** Ar -- Ar

|    |              |              |               |
|----|--------------|--------------|---------------|
| Ar | 0.0000000000 | 0.0000000000 | -1.8319000000 |
| Ar | 0.0000000000 | 0.0000000000 | 1.8219000000  |

**Dimer 39:** He -- He

|    |              |              |               |
|----|--------------|--------------|---------------|
| He | 0.0000000000 | 0.0000000000 | -1.3700000000 |
| He | 0.0000000000 | 0.0000000000 | 1.3700000000  |
